# Supplementary material for: Feruloyl Glyceride Mitigates Tomato Postharvest Rot by Inhibiting Penicillium expansum Spore Germination and Enhancing Suberin Accumulation
Source: MDPI journal article supplement (doi:10.3390/foods13081147), 2024-04-10
Supplement: s1 [file s1]

**Table S1.** The sequence of qPCR primers

| Gene                  | F / R | Sequence (5'-3')        |
|-----------------------|-------|-------------------------|
| <i>SlActin</i>        | F     | CGAGCAGTGTTTCCCAGTATT   |
|                       | R     | AGCCTGGATAGCAACATACATAG |
| <i>18SrRNA (18Sr)</i> | F     | ATTGGAGGGCAAGTCTGGTG    |
|                       | R     | CCAGTGAAGGCCATGGGATT    |
| <i>SlUBI</i>          | F     | AGGTTGATGACACTGGAAAGGTT |
|                       | R     | AATCGCCTCCAGCCTTGTGTGA  |
| <i>SIPAL1</i>         | F     | GGTGAGAACTTGACGCTCAT    |
|                       | R     | GCTGCAACTGGAAAAATCCACC  |
| <i>SILACS8</i>        | F     | CTGGGAAGGGGCTACAACTG    |
|                       | R     | ACTCCCACTGATACTCCCCC    |
| <i>SIFAR4</i>         | F     | ACTCCGCAGCAAATACCACA    |
|                       | R     | GCGGTCTGAATAATGGATGAGG  |
| <i>SlKCS11</i>        | F     | CCAACACCCTCTCTGTCCTC    |
|                       | R     | TGGATGCTCTCCGTGCTAAC    |
| <i>SICYP86A1</i>      | F     | AGCCACTGAAGCCACTATGC    |
|                       | R     | CCTTACGCGAATCCAAAGCC    |
| <i>SICYP86B1</i>      | F     | TTCGGAACATGACGGCAGAT    |
|                       | R     | CTGGATCAACCCCAAAGGCA    |
| <i>SIGPAT5</i>        | F     | CGGCTAGAGGATGGAAAGGG    |
|                       | R     | GACTCGATTTCCCCGCGTTA    |
| <i>SIPPO</i>          | F     | GTTGGTGGTCTTCCCTTCGT    |
|                       | R     | ATGACGACGGAAGCTGGAAG    |
| <i>SlLOX5</i>         | F     | ATCCGAACCGATGGTGAAGG    |
|                       | R     | AGGATTTACTCCGGCAAGCA    |
