# Supplementary material for: Feruloyl Glyceride Mitigates Tomato Postharvest Rot by Inhibiting Penicillium expansum Spore Germination and Enhancing Suberin Accumulation
Source: Foods. 2024 Apr 10;13(8):1147. doi: 10.3390/foods13081147 (PMC11049243; doi:10.3390/foods13081147)
Supplement: Supplementary file 1 [file foods-13-01147-s001.zip]

Archive with 8 entries (8 files):
- Supplemental Figures.pdf
- Table S1. The sequence of qPCR primers.pdf
- Table S2. Quantities of various compounds.xlsx
- Table S3. DMs with up-regulated expression.xlsx
- Table S4. DEGs with up-regulated expression.xlsx
- Table S5. DEGs in the suberin synthesis pathway.xlsx
- Table S6. DMs in suberin synthesis pathway.xlsx
- Table S7. Correlation analysis.xlsx
