# Supplementary material for: Feruloyl Glyceride Mitigates Tomato Postharvest Rot by Inhibiting Penicillium expansum Spore Germination and Enhancing Suberin Accumulation
Source: Foods. 2024 Apr 10;13(8):1147. doi: 10.3390/foods13081147 (PMC11049243; doi:10.3390/foods13081147)
Supplement: Supplementary file 1 [file foods-13-01147-s001.zip › Table S2. Quantities of various compounds.xlsx]

## Sheet: Sheet1
Class	count
Alkaloids	61
Lipids	58
Flavonoids	52
Amino acids and derivatives	50
Phenolic acids	49
Terpenoids	35
Others	20
Lignans and Coumarins	12
Organic acids	10
Quinones	5
Steroids	4
Nucleotides and derivatives	2
Tannins	2
