# Supplementary material for: Feruloyl Glyceride Mitigates Tomato Postharvest Rot by Inhibiting Penicillium expansum Spore Germination and Enhancing Suberin Accumulation
Source: Foods. 2024 Apr 10;13(8):1147. doi: 10.3390/foods13081147 (PMC11049243; doi:10.3390/foods13081147)
Supplement: Supplementary file 1 [file foods-13-01147-s001.zip › Table S3. DMs with up-regulated expression.xlsx]

## Sheet: Sheet1
Index	Formula	Compounds	Class I	Class II	CAS	Level	Log2FC	Type	CK-1	CK-2	CK-3	FG-1	FG-2	FG-3	VIP	P-value	Fold_Change
MW0151505	C31H51N9O8	Ile-Lys-Arg-Asp-Phe	Amino acids and derivatives	Amino acids and derivatives	-	3	14.213	up	9	9	9	180575	170012	162167	1.41016	0.000972366	18990.9
Lmtp003948	C22H24O12	3',5',5,7-Tetrahydroxy-4'-methoxyflavanone-3'-O-glucoside	Flavonoids	Flavones	-	3	12.7925	up	9	9	9	69340	54445.8	67769.5	1.41005	0.00543233	7094.64
MWS3149	C8H8O3	3-Methoxybenzoic acid	Phenolic acids	Phenolic acids	586-38-9	3	12.7579	up	9	9	9	71509.5	36327.5	79173.6	1.40823	0.0419933	6926.32
pmb0592	C34H42O20	Chrysoeriol-7-O-rutinoside-5-O-glucoside	Flavonoids	Flavones	-	3	12.7511	up	9	9	9	58379.9	73666	54089.2	1.40981	0.00904709	6893.89
Lmlp007435	C30H28O12	Isosalipurposide-6''-O-p-coumaric acid	Flavonoids	Chalcones	-	3	11.8571	up	9	9	9	39865.7	25320.6	34977.8	1.40952	0.0159983	3709.78
MW0145516	C12H24N6O5	Arg-Thr-Gly	Amino acids and derivatives	Amino acids and derivatives	-	3	10.6456	up	9	9	9	17165.1	13504.5	12582.4	1.40969	0.00930245	1601.92
pmn001407	C30H48O6	2,3,16,21-Tetrahydroxyolean-12-en-28-oic acid (Platycogenic acid C)	Terpenoids	Triterpene	26121-81-3	2	10.3353	up	9	9	9	13424.7	16364.1	5092.94	1.40241	0.0750353	1291.92
MWS2067	C12H10O	2-Phenylphenol	Phenolic acids	Phenolic acids	90-43-7	3	9.13586	up	9	9	9	5902.15	3204.17	6082.77	1.40733	0.032291	562.559
MW0168835	C6H12O6	beta-D-Galactose	Others	Saccharides	7296-64-2	3	7.10742	up	7275.77	5429.81	10370.3	1.48894e+06	923159	769933	1.40127	0.0405106	137.894
MW0158510	C25H38N4O8	Tyr-Ile-Val-Glu	Amino acids and derivatives	Amino acids and derivatives	-	3	6.42493	up	5217.29	3349.82	3135.29	289183	413396	302898	1.40418	0.0137778	85.9207
Zahp006974	C17H17NO2	Cinnamoyltyramine	Alkaloids	Phenolamine	20384-14-9	1	6.33271	up	52469.4	33681.4	24848.6	3.37595e+06	2.61294e+06	2.95767e+06	1.40219	0.00551251	80.6001
MWS2070	C10H12O3	Propyl 4-hydroxybenzoate	Phenolic acids	Phenolic acids	94-13-3	1	6.21102	up	241077	184856	263754	1.80601e+07	1.46795e+07	1.83525e+07	1.40753	0.00487162	74.0802
Wagp007639	C17H17NO2	N-(4-hydroxyphenethyl)cinnamamide	Alkaloids	Alkaloids	-	1	6.15513	up	61766.2	38432.9	24616.2	3.36533e+06	2.75109e+06	2.77862e+06	1.39843	0.00456587	71.2656
Zbsp007466	C17H17NO2	N-trans-cinnamoylphydroxyphenylethylamine	Alkaloids	Phenolamine	-	2	6.11217	up	66006.1	42520.8	21306.9	3.40859e+06	2.6892e+06	2.88341e+06	1.39289	0.00513262	69.1747
MWSmce517	C11H16O2	Olivetol	Phenolic acids	Phenolic acids	500-66-3	2	5.93172	up	188439	142087	203702	1.13029e+07	9.9734e+06	1.13339e+07	1.40768	0.00172734	61.0417
HJN011	C17H17NO4	Tataramide A	Alkaloids	Phenolamine	-	1	5.46394	up	591467	355757	383621	2.08246e+07	1.76967e+07	2.02192e+07	1.40425	0.00237308	44.1378
MWSmce363	C8H8O3	2,5-Dihydroxyacetophenone	Phenolic acids	Phenolic acids	490-78-8	3	5.37156	up	18549.2	12880	21495.4	726553	553377	911147	1.40125	0.0203142	41.4
pme2563	C8H14N2O5S	γ-Glu-Cys	Amino acids and derivatives	Amino acids and derivatives	636-58-8	3	5.36564	up	6363.94	15124.1	9012.32	248980	169462	839100	1.35037	0.192406	41.2304
MW0152534	C31H52N8O8	Leu-Tyr-Arg-Ile-Thr	Amino acids and derivatives	Amino acids and derivatives	-	3	5.29996	up	30051.1	29630.3	20447.2	1.05555e+06	1.09293e+06	1.00822e+06	1.40668	0.000474673	39.3954
MW0150284	C20H37N9O7	Gly-Ala-Asn-Val-Arg	Amino acids and derivatives	Amino acids and derivatives	-	3	5.26193	up	7190.02	7858.77	9	258011	220929	98836.9	1.08079	0.059499	38.3706
MW0015940	C22H38O7	6-O-Palmitoylascorbic acid	Others	Others	137-66-6	3	5.24653	up	7129.74	5565.79	5033.88	205691	247522	219853	1.40689	0.00308249	37.9632
Wbmp010456	C18H28O2	Macrophypene B	Terpenoids	Ditepenoids	-	1	5.20837	up	111075	90563.9	94588	2.70545e+06	3.48467e+06	4.76207e+06	1.40357	0.0273106	36.9722
MW0169625	C20H37O5P	Palmitoleoyl 3-carbacyclic Phosphatidic Acid	Others	Others	910228-13-6	3	5.14084	up	65501.4	61545.9	74485.4	1.04109e+06	2.66174e+06	3.40754e+06	1.37997	0.0809782	35.2815
MW0014090	C16H32O3	3-Hydroxyhexadecanoic acid	Lipids	Free fatty acids	-	3	5.12242	up	33844.6	32779.5	32102.6	954477	1.07391e+06	1.41064e+06	1.40735	0.0147128	34.8338
Wcgp009524	C20H34O2	Kaurane-16,17-diol	Terpenoids	Ditepenoids	16836-31-0	1	4.99428	up	15514.6	10190.7	11209.4	324399	358419	493778	1.40235	0.0179616	31.8733
Zahp007439	C10H8O3	3,4-Methylenedioxycinnamaldehyde	Others	Aldehyde compounds	58095-77-5	1	4.951	up	382798	408342	371425	1.31798e+07	7.05747e+06	1.57224e+07	1.39628	0.0457989	30.9314
Lmbn005822	C18H34O4	9,10-DHOME; (12Z)-9,10-Dihydroxyoctadec-12-enoic acid	Lipids	Free fatty acids	263399-34-4	1	4.92012	up	3738.06	4443.85	4989.38	125089	114781	158908	1.40676	0.0105377	30.2763
pma0461	C18H28O2	14,15-Dehydrocrepenynic acid	Lipids	Free fatty acids	4154-44-3	3	4.76444	up	161803	114677	139214	3.57107e+06	3.16954e+06	4.55768e+06	1.40449	0.0126089	27.1794
MW0168670	C18H28O2	9,12-Octadecadiynoic Acid	Lipids	Free fatty acids	2012-14-8	3	4.72874	up	155742	118838	118759	3.17e+06	2.85304e+06	4.40641e+06	1.40351	0.0194239	26.5151
MW0156747	C22H30N4O11	Ser-Glu-Tyr-Glu	Amino acids and derivatives	Amino acids and derivatives	-	3	4.72792	up	12071.2	14937.4	5660.83	334234	314963	216541	1.38417	0.0163598	26.5
pmf0395	C18H34O2	Oleic acid	Lipids	Free fatty acids	112-80-1	3	4.66421	up	146325	119167	134008	3.09214e+06	2.77719e+06	4.26008e+06	1.40483	0.018773	25.3552
MWS1839	C9H10O3	Ethylparaben	Phenolic acids	Phenolic acids	120-47-8	1	4.61203	up	13143.1	8080.74	8953.44	136483	175391	426099	1.37045	0.121518	24.4546
pme0220	C13H20O3	Methyl jasmonate	Organic acids	Organic acids	1211-29-6	3	4.5816	up	18008.8	19339.3	18405.4	486023	287173	561771	1.39893	0.0349503	23.9441
Hmjp005556	C17H17NO3	(2E)-3-(4-Hydroxyphenyl)-N-[2-(4-hydroxyphenyl)ethyl]-2-propenamide	Alkaloids	Alkaloids	-	1	4.54368	up	49637.2	41657.7	28384.9	881202	1.01121e+06	898890	1.40171	0.0017047	23.323
MW0102909	C18H34O2	trans-Vaccenic acid	Lipids	Free fatty acids	693-72-1	3	4.48414	up	166587	137925	163288	3.1997e+06	2.92586e+06	4.34383e+06	1.40504	0.0165141	22.3801
Wahp002067	C13H18N2O2	p-Coumaroylputrescine	Alkaloids	Phenolamine	34136-53-3	1	4.45512	up	135063	118466	96413.5	2.67017e+06	1.935e+06	3.0706e+06	1.40196	0.0179518	21.9344
MW0153625	C19H29N3O5S2	Met-Met-Tyr	Amino acids and derivatives	Amino acids and derivatives	-	3	4.43972	up	461561	151776	416495	7.4206e+06	6.80253e+06	8.1258e+06	1.37423	0.00174848	21.7015
mws1024	C9H8O2	p-Coumaraldehyde	Phenolic acids	Phenolic acids	2538-87-6	3	4.40157	up	2691.42	1115.61	649.503	28555.4	32196.2	33437.3	1.36378	0.000622509	21.135
MWS1912	C13H22O3	Methyl dihydrojasmonate	Organic acids	Organic acids	24851-98-7	3	4.37426	up	4914.46	3089.33	7011.71	118215	104381	88808.3	1.39095	0.00654835	20.7389
Zmwp005562	C17H17NO3	cis-N-p-Coumaroyltyramine	Alkaloids	Phenolamine	-	1	4.36865	up	65279.8	42191.1	26690.2	1.03859e+06	808654	924295	1.38866	0.00467629	20.6583
Wdhp006295	C17H17NO3	N-p-Coumaroyl tyramin	Alkaloids	Isoquinoline alkaloids	20375-37-5	1	4.36134	up	2.03512e+06	1.33962e+06	1.00877e+06	2.73217e+07	2.95937e+07	3.31826e+07	1.39631	0.00279695	20.5538
MWSmce089	C17H17NO3	p-Coumaroyltyramine	Alkaloids	Phenolamine	36417-86-4	1	4.24204	up	70258.5	49979.5	34135.6	1.00628e+06	889733	1.02513e+06	1.39544	0.00125505	18.9226
pmb3075	C16H16O7	3-O-p-Coumaroylshikimic acid	Phenolic acids	Phenolic acids	-	3	4.23617	up	7830.28	4928.04	2372.07	88876.3	97871	98396	1.3737	0.000132952	18.8457
Wbmp007967	C22H36O4	Vitexifolin F	Terpenoids	Ditepenoids	-	1	4.21821	up	71674.7	71962.5	67745.4	1.26745e+06	1.10277e+06	1.56416e+06	1.40698	0.0116207	18.6126
MWS5231	C13H24O4	Tridecanedioic acid	Lipids	Free fatty acids	505-52-2	1	4.18916	up	102627	93894.7	117065	1.86231e+06	1.78232e+06	2.07569e+06	1.40818	0.00223627	18.2416
Wafp004987	C18H17NO4	N-Feruloylphenylacetamide	Alkaloids	Phenolamine	-	1	4.10565	up	225359	164346	321981	3.44757e+06	3.37852e+06	5.4261e+06	1.38942	0.0286459	17.2157
Lmfp005064	C56H92O29	Digitogenin-3-O-glucosyl(1→3)galactosyl(1→2)[xylosyl(1→3)]glucosyl(1→4)galactoside (Digitonin)	Steroids	Steroidal saponins	11024-24-1	3	4.0779	up	70248.6	106546	105694	1.61138e+06	1.73447e+06	1.42472e+06	1.4031	0.00315179	16.8877
MWSslk154	C12H20O7	Triethyl citrate	Organic acids	Organic acids	77-93-0	3	4.02101	up	16221.3	21159	19559.2	362682	309207	252506	1.40422	0.0117557	16.2347
Lmzn206829	C30H46O3	3-Oxoolean-12-en-28-oic Acid (Oleanonic acid)	Terpenoids	Triterpene	17990-42-0	3	4.01638	up	8996.24	9744.66	6726.43	102513	131865	177750	1.39693	0.027487	16.1827
pmb0751	C16H16O7	Trans-5-O-(p-Coumaroyl)shikimate	Phenolic acids	Phenolic acids	-	3	4.01427	up	51234.2	41666.1	35320.7	621932	663622	786377	1.40405	0.00542462	16.159
pmb0889	C18H30O2	Punicic acid (9Z,11E,13Z-octadecatrienoic acid)	Lipids	Free fatty acids	544-72-9	3	3.98127	up	1.00252e+06	701537	636065	1.1167e+07	1.11395e+07	1.46526e+07	1.39985	0.00955076	15.7937
Wbmn011269	C22H34O5	Vitexilactone	Terpenoids	Ditepenoids	61263-49-8	1	3.88634	up	71759	54228.5	40113.6	683186	832083	941002	1.39587	0.00867162	14.7878
Wbmn010746	C22H34O5	Negundoin A	Terpenoids	Ditepenoids	-	1	3.82808	up	69108	53278.9	44012.6	667017	749826	946452	1.39905	0.0120663	14.2025
Yshs000041	C26H36O7	Vibsanin J	Terpenoids	Ditepenoids	-	1	3.72342	up	4325.41	3347.03	3703.61	41511.5	49565.1	59186.2	1.40319	0.0117638	13.2087
pmb1574	C18H28O2	9,12-Octadecadien-6-Ynoic Acid	Lipids	Free fatty acids	61481-29-6	3	3.72199	up	24758.4	12039.4	38736.4	315879	322592	358250	1.36541	0.000165838	13.1956
MW0144577	C17H27N5O11	Ala-Gly-Asp-Glu-Ser	Amino acids and derivatives	Amino acids and derivatives	-	3	3.63957	up	35109	21123.3	26959.7	396376	201685	438752	1.37442	0.0484943	12.4629
MWS1734	C8H8O3	Anisic acid; 4-Methoxybenzoic acid	Phenolic acids	Phenolic acids	100-09-4	2	3.59386	up	6282.07	8371.45	4027.99	78216.6	48656.9	98691.8	1.37277	0.040705	12.0743
pmn001692	C18H19NO5	3-O-Acetylhamayne	Alkaloids	Isoquinoline alkaloids	-	1	3.59221	up	11077.5	17638.7	17886.6	144704	193909	223437	1.3932	0.0166696	12.0604
HJN016	C36H36N2O8	Cannabisin D	Alkaloids	Alkaloids	-	1	3.5766	up	6725.49	14929.5	49144.3	178361	345348	320972	1.29036	0.0321414	11.9307
MWStz038	C36H36N2O8	Grossamide	Alkaloids	Phenolamine	80510-06-1	1	3.54621	up	28339.1	62988.1	162007	743080	1.1041e+06	1.11225e+06	1.31643	0.0113756	11.6819
pmb2804	C18H32O4	13S-Hydroperoxy-9Z,11E-octadecadienoic acid	Lipids	Free fatty acids	33964-75-9	3	3.45732	up	139588	101313	96158	1.03754e+06	1.14722e+06	1.51747e+06	1.39704	0.0156794	10.9839
Hmcn002743	C22H26O8	Lirioresinol A	Lignans and Coumarins	Lignans	-	3	3.45569	up	2407.76	3154.31	986.238	6300.41	38299.1	27245.5	1.22012	0.145554	10.9715
MWSHY0111	C22H22O10	Calycosin-7-O-glucoside	Flavonoids	Isoflavones	20633-67-4	3	3.34304	up	250907	155624	268933	2.7995e+06	1.9889e+06	2.0658e+06	1.38827	0.01408	10.1474
MW0158251	C20H26N4O7	Trp-Thr-Glu	Amino acids and derivatives	Amino acids and derivatives	-	3	3.33384	up	30206.1	19228	23244.9	294040	119210	319564	1.34876	0.0726485	10.0829
pmp001253	C36H36N2O8	Cannabisin F	Alkaloids	Phenolamine	163136-19-4	1	3.32666	up	7433.33	18022.2	55453.7	160541	311828	339384	1.26999	0.0408643	10.0329
Rfmb091	C18H32O3	9S-Hydroxy-10E,12Z-octadecadienoic acid	Lipids	Free fatty acids	15514-85-9	2	3.28988	up	243744	142107	116060	1.42257e+06	1.52424e+06	1.96203e+06	1.3796	0.00944621	9.78028
MWS1848	C8H8O2	Phenyl acetate	Phenolic acids	Phenolic acids	122-79-2	2	3.27696	up	104039	202256	101735	1.74811e+06	647805	1.55918e+06	1.33517	0.0722072	9.69312
MW0109821	C19H23N7O6	Tetrahydrofolic acid	Organic acids	Organic acids	135-16-0	3	3.23339	up	1.34291e+06	634063	1.19347e+06	1.28164e+07	7.98058e+06	9.02029e+06	1.36958	0.024279	9.40476
Qagp006800	C36H36N2O8	Lyciumamide B	Alkaloids	Phenolamine	-	1	3.23179	up	15502.9	33226.3	95139.8	300234	513671	537646	1.28762	0.0246427	9.39432
MWSmce466	C8H8O2	4-Hydroxyacetophenone	Phenolic acids	Phenolic acids	99-93-4	1	3.18955	up	138437	177740	104492	1.65573e+06	835813	1.34632e+06	1.37475	0.0403921	9.12324
mws1366	C27H44O3	Spirostan-3-ol (Tigogenin)	Steroids	Steroid	77-60-1	3	3.18813	up	83708.8	79615.2	50302.9	813495	522442	611115	1.38596	0.0202256	9.11426
Zmyn004732	C18H30O3	2R-hydroxy-9Z,12Z,15Z-octadecatrienoic acid	Lipids	Free fatty acids	-	1	3.15154	up	202670	165303	133103	1.16919e+06	1.38705e+06	1.89637e+06	1.38993	0.0248935	8.88606
Lmmn006306	C18H30O3	Machilusolide D	Others	Lactones	-	2	3.12998	up	986389	659422	575480	5.49033e+06	6.14329e+06	7.81208e+06	1.38823	0.012103	8.75423
MW0154288	C24H25N3O6	Nap-Lys-OH	Amino acids and derivatives	Amino acids and derivatives	-	3	3.11988	up	42356	88705.3	60535.1	511081	496753	657740	1.38203	0.00753837	8.69315
pmb0508	C14H20N4O2	p-Coumaroylagmatine	Alkaloids	Phenolamine	7295-86-5	1	3.11513	up	67250.3	47585.9	68038.9	389437	520120	674979	1.38666	0.0291269	8.66458
MW0146289	C20H26N4O6S1	Asp-Trp-Met	Amino acids and derivatives	Amino acids and derivatives	-	3	3.09352	up	14246.2	9124.07	11696.5	81965.2	89891.1	127466	1.38884	0.0234226	8.53576
pmb2787	C18H30O3	9-Oxo-10E,12Z-octadecadienoic acid	Lipids	Free fatty acids	54232-59-6	3	3.02817	up	16636.9	10267.5	11921.8	98201.4	97900.8	120631	1.39376	0.00438826	8.15773
Wafn011571	C18H32O3	alpha-Hydroxylinoleic acid	Lipids	Free fatty acids	57818-44-7	1	3.01909	up	320591	202118	162634	1.6518e+06	1.74434e+06	2.15965e+06	1.38108	0.00552778	8.10659
Lmbn005369	C18H32O3	13(S)-HODE;13(S)-Hydroxyoctadeca-9Z,11E-dienoic acid	Lipids	Free fatty acids	10219-69-9	1	3.01799	up	321179	190195	148957	1.42991e+06	1.75218e+06	2.16684e+06	1.37007	0.0140763	8.10037
Hmyn007168	C22H45O9P	LysoPG 16:0	Lipids	Glycerol ester	-	3	2.97665	up	9255.75	7689.19	9759.47	43867.5	94030	72307.4	1.37306	0.0517772	7.87154
pmn001338	C21H18O11	Rhein-8-O-glucoside	Quinones	Anthraquinone	34298-86-7	3	2.97349	up	199081	102136	151426	1.45512e+06	1.00779e+06	1.09229e+06	1.37728	0.01426	7.85432
MW0110059	C22H32N6O5	Trp-Gln-Lys	Amino acids and derivatives	Amino acids and derivatives	-	3	2.97036	up	6224.01	19410.2	40145.5	257680	35393.7	222464	1.0875	0.159337	7.83734
MW0158562	C22H26N4O6	Tyr-Phe-Asn	Amino acids and derivatives	Amino acids and derivatives	-	3	2.92898	up	6526.47	4972.91	13500.8	81063.9	54547.5	54783	1.34659	0.0178653	7.61571
Hmbp002333	C17H22O10	10-Dehydrogeniposide	Terpenoids	Sesquiterpenoids	-	3	2.82322	up	5315.26	1850.8	9601.16	47043.6	19079.9	52545.2	1.23004	0.0757021	7.07742
mws0089	C21H20O11	Kaempferol-7-O-glucoside	Flavonoids	Flavonols	16290-07-6	2	2.80792	up	12127.3	8420.32	11456.1	66656.6	70388.4	87068.6	1.39545	0.00786338	7.00274
Zjhp082621	C38H60O12	Disogenin-Glc-Xyl	Steroids	Steroidal saponins	-	2	2.80291	up	64950.8	66657.1	64786.4	455181	476917	438430	1.40966	0.000784985	6.97845
Wafp003258	C24H27NO9	N-Feruloylphenylacetamide glucoside	Alkaloids	Phenolamine	-	1	2.77949	up	11038.4	11497.2	16568.2	81303.3	44752.4	142435	1.31535	0.114782	6.86612
pme1002	C8H11NO	L-Tyramine	Alkaloids	Alkaloids	51-67-2	1	2.75261	up	3.92227e+06	3.26199e+06	4.49186e+06	2.86607e+07	2.06738e+07	2.93549e+07	1.39384	0.014058	6.73935
pmn001700	C30H48O3	24,30-Dihydroxy-12(13)-ene-lupeol	Terpenoids	Triterpene	-	3	2.75221	up	45041	33856.6	53626.2	307653	266274	318953	1.394	0.00165019	6.7375
pmf0557	C16H11N2NaO4S	Orange I	Alkaloids	Alkaloids	523-44-4	3	2.71291	up	71290.4	59829.6	60397.3	324397	386523	544750	1.38929	0.032183	6.55643
pma0134	C4H8O4	D-Threose	Others	Saccharides	95-43-2	3	2.70286	up	254569	218284	251439	1.75406e+06	1.24226e+06	1.71949e+06	1.3982	0.0147026	6.51093
Wafp003720	C24H29NO10	N-Feruloyloctopamine glucoside	Alkaloids	Phenolamine	-	1	2.60084	up	422168	71204.3	548808	1.85782e+06	1.97277e+06	2.49167e+06	1.19798	0.00262689	6.06638
Hmln005776	C32H52O13	Capsianoside IV	Terpenoids	Ditepenoids	-	3	2.59483	up	34579	33223.9	34475.3	174601	212385	230895	1.4042	0.00912548	6.04118
Wafp004334	C24H29NO9	N-Feruloyltyramine 4'-glucoside	Alkaloids	Phenolamine	-	1	2.54327	up	246953	325421	392033	2192794	1.8926e+06	1.53621e+06	1.38553	0.0116123	5.82908
Hmbp003234	C12H14O6	1-O-Caffeoylglycerol	Phenolic acids	Phenolic acids	-	3	2.53702	up	21784.4	18712.6	7322.3	111949	72420.5	93168	1.3115	0.0126594	5.80387
Smln004290	C17H12O6	Aloesaponarin I	Quinones	Anthraquinone	-	3	2.51993	up	69140.4	63076.7	50814.2	308820	326441	414521	1.39529	0.0109405	5.73553
MEDL00397	C14H28O3	3-hydroxy-tetradecanoic acid	Organic acids	Organic acids	1961-72-4	3	2.51871	up	4587.85	2862.31	3214.3	16389.4	16985.5	27740	1.36599	0.0424457	5.73071
Hmdn006566	C30H48O3	3,4-Open loop-lupine-4(23),20(29)-diene-24-hydroxy-3-carboxylic acid	Terpenoids	Triterpene	-	3	2.51479	up	5776.56	4820.99	5030.7	20823.7	25279.1	43214.9	1.36352	0.0693518	5.71514
Zmhn003030	C22H24O9	4-O-(6'-O-Glucosyl-p-coumaroyl)-4-hydroxybenzyl alcohol	Phenolic acids	Phenolic acids	-	3	2.49935	up	2696.38	5336.56	4800.54	17250.8	29120.8	26192.9	1.35142	0.0259134	5.65431
Wbsp000314	C32H50O5	16-oxo-21β,24-dihydroxyserrat-14-en-3α-yl acetate	Terpenoids	Terpene	-	2	2.47974	up	367884	340910	307868	1.99661e+06	1.67175e+06	2.00256e+06	1.40426	0.0041361	5.57798
MWSmce140	C17H18O3	trans-Trimethoxyresveratrol	Others	Stilbene	22255-22-7	3	2.47934	up	15247.4	9505.86	10214	68082.6	50483.7	76427.1	1.37571	0.0158579	5.57644
pmp000970	C20H30O3	Hispanolone	Terpenoids	Ditepenoids	18676-07-8	3	2.45924	up	29686.5	23933.2	19299.6	144299	107931	148775	1.38555	0.0105641	5.49929
pmn001340	C23H22O11	Emodin-8-O-(6''-O-acetyl)glucoside	Quinones	Anthraquinone	-	3	2.43849	up	35216.7	47007.5	26471.7	171088	186963	231160	1.3783	0.00732657	5.42072
MW0149611	C17H27N5O10	Gln-Ala-Glu-Asp	Amino acids and derivatives	Amino acids and derivatives	-	3	2.33411	up	886063	721488	657529	5.27708e+06	2.689e+06	3.45538e+06	1.36026	0.0567543	5.04241
Hmqn004825	C18H30O3	Rabdosia acid A	Lipids	Free fatty acids	-	3	2.31844	up	17879.3	14083	27481.6	100033	86825.9	109643	1.36717	0.00133186	4.98793
MW0158406	C20H26N4O10	Tyr-Asp-Ala-Asp	Amino acids and derivatives	Amino acids and derivatives	-	3	2.30786	up	70755.3	58726.9	38569.7	256286	293682	282141	1.37483	0.000127469	4.95149
Zmjn004133	C18H32O4	9S-Hydroperoxy-10E,12Z-octadecadienoic acid	Lipids	Free fatty acids	5502-91-0	3	2.2645	up	64177.1	55405.1	89756.5	285580	306867	413404	1.37427	0.016463	4.8049
Lmbn005662	C18H32O3	9(10)-EpOME;(9R,10S)-(12Z)-9,10-Epoxyoctadecenoic acid	Lipids	Free fatty acids	16833-56-0	3	2.25984	up	8743.59	11684.4	9320.01	30091.2	39426.2	72957	1.32571	0.101254	4.78938
Zmyn004449	C18H30O4	9-Hydroxy-12-oxo-10(E),15(Z)-octadecadienoic acid	Lipids	Free fatty acids	-	2	2.25499	up	137097	111647	97292	464760	532468	654505	1.38758	0.0129916	4.7733
MWSmce439	C9H8O2	3,4-Dihydrocoumarin	Lignans and Coumarins	Coumarins	119-84-6	3	2.24599	up	5729.94	9227.44	6891.68	20734.5	39936.1	42973.2	1.33146	0.0565994	4.74363
Wafp003158	C16H24N4O3	N-Feruloylhomoagmatine	Alkaloids	Phenolamine	-	1	2.22223	up	304321	115151	177080	828541	753739	1.20131e+06	1.3098	0.0221083	4.66614
pmn001706	C30H48O4	2,3-Dihydroxyolean-12-en-28-oic acid (2-Hydroxyoleanolic acid)	Terpenoids	Triterpene	26707-60-8	3	2.20954	up	41521	31528.9	38820.5	153968	165091	198373	1.39486	0.00728123	4.62529
MW0146155	C24H34N4O9	Asp-Ile-Phe-Glu	Amino acids and derivatives	Amino acids and derivatives	-	3	2.20894	up	67160.5	71185.4	50294.3	199806	242509	429833	1.33587	0.0829946	4.62334
pmb2999	C22H22O11	Chrysoeriol-5-O-glucoside	Flavonoids	Flavones	-	3	2.18519	up	141426	140824	84579.6	742838	343068	582378	1.31795	0.0613213	4.54785
mws2105	C14H12O3	Benzyl salicylate	Phenolic acids	Phenolic acids	118-58-1	3	2.17299	up	5572.51	16834.6	6040.6	49340	35169	43778.1	1.28799	0.00398695	4.50958
Lmmn003323	C16H32O3	2-Hydroxyhexadecanoic acid	Organic acids	Organic acids	764-67-0	1	2.1709	up	1.38823e+06	929393	869521	3.80362e+06	4.72323e+06	5.82497e+06	1.36636	0.0178077	4.50303
Cmyp002064	C22H22O11	Yuanhuanin	Flavonoids	Flavones	83133-14-6	3	2.16575	up	92601.3	45105.7	94691.9	485263	212772	344739	1.28188	0.069849	4.487
Rfmb087	C18H32O4	9-Hydroxy-13-oxo-10-octadecenoic Acid	Lipids	Free fatty acids	-	3	2.15329	up	80580.1	63577.2	61770.8	267110	282163	366781	1.3892	0.0141555	4.44842
Lmqn009065	C21H41O7P	PA(18:1/0:0)	Lipids	Glycerol ester	65528-98-5	3	2.1333	up	143399	202295	180130	782248	787295	737348	1.39789	1.50774e-05	4.3872
mws0889	C4H8O5	D-Threonic Acid	Others	Saccharides	3909-12-4	1	2.09862	up	300139	257335	284032	1.15583e+06	1.11728e+06	1.33106e+06	1.40353	0.00396027	4.28299
MW0000125	C18H21NO5	(3alpha,11S)-1,2-Didehydro-3,7-dimethoxycrinan-11-ol	Alkaloids	Alkaloids	3660-62-6	3	2.09531	up	106832	157416	210344	916114	273115	838780	1.19007	0.122165	4.27317
MWSHC20125	C16H16O8	5-O-Caffeoylshikimic acid	Phenolic acids	Phenolic acids	73263-62-4	1	2.05457	up	283348	404214	261466	1.23996e+06	1.25246e+06	1.45003e+06	1.3846	0.00057999	4.1542
MWSmce689	C19H32O2	Methyl linolenate	Lipids	Free fatty acids	301-00-8	1	2.0358	up	113402	48971.9	56119.7	245408	277507	373013	1.31028	0.013265	4.10049
Zaln004057	C16H16O8	4-caffeoylshikimic acid	Phenolic acids	Phenolic acids	-	1	2.03558	up	652892	524964	235381	2.21406e+06	982775	2.59726e+06	1.20419	0.0875323	4.09988
MW0155309	C23H29N3O4	Phe-Phe-Val	Amino acids and derivatives	Amino acids and derivatives	-	3	2.01992	up	9256.91	4804.41	19869.7	35858.2	45325.2	56427.6	1.23116	0.0115482	4.05561
Zmjp013311	C41H70O13	Gynoside A	Terpenoids	Triterpene Saponin	-	3	2.01802	up	9126.6	8226.03	12033.3	46780.8	17385.3	54855.3	1.22139	0.118255	4.05029
mws0520	C11H13NO4	N-Acetyl-L-tyrosine	Amino acids and derivatives	Amino acids and derivatives	537-55-3	3	2.01192	up	54634.3	53802.3	43734.5	241430	188987	183316	1.39167	0.0119008	4.03318
MWSslk132	C16H30O4	Hexadecanedioic acid	Lipids	Free fatty acids	505-54-4	1	2.00624	up	60496.6	64165.5	70749.7	223619	242142	319272	1.39122	0.0205832	4.01733
MWS80007	C18H32O4	13-Hydroperoxy-9Z,11E-octadecadienoic acid	Lipids	Free fatty acids	23017-93-8	3	2.00243	up	7961.57	7605.91	7203.75	29874.7	32464.5	28899.5	1.40685	0.00151178	4.00675
pmb0496	C15H22N4O3	N-Feruloylagmatine	Alkaloids	Phenolamine	-	1	1.99607	up	617412	298215	711464	1.17753e+06	2.116e+06	3.19714e+06	1.21993	0.10285	3.98913
pme3255	C11H14O2	Methyleugenol	Phenolic acids	Phenolic acids	93-15-2	3	1.99002	up	3415.24	11594.4	6459.69	34199.5	19325.3	31760.6	1.24575	0.026207	3.97243
Hmqn003054	C18H34O5	9,10,11-Trihydroxy-12-octadecenoic acid	Lipids	Free fatty acids	61911-67-9	2	1.97839	up	21048.2	27105.2	20126.4	82741.2	81876.6	104442	1.38982	0.0077444	3.94054
Lssp210092	C18H19NO4	N-trans-ferulic tyramine	Alkaloids	Phenolamine	-	1	1.97328	up	4.80032e+06	3.19123e+06	7.5957e+06	1.84724e+07	2.26111e+07	2.01214e+07	1.32533	0.00101033	3.9266
Lmbn005287	C18H32O4	7S,8S-DiHODE; (9Z,12Z)-(7S,8S)-Dihydroxyoctadeca-9,12-dienoic acid	Lipids	Free fatty acids	143288-65-7	2	1.96107	up	8687.74	9106.82	7801.54	28157.8	34437.6	37063	1.39722	0.0100551	3.8935
MW0145834	C19H29N5O5	Asn-Lys-Phe	Amino acids and derivatives	Amino acids and derivatives	-	3	1.95978	up	546560	725673	713731	2.57666e+06	2.55861e+06	2.59017e+06	1.39873	0.000705316	3.89002
Lssp210093	C18H19NO5	7-hydroxy-N-trans-ferulic tyramine	Alkaloids	Phenolamine	-	1	1.94738	up	486434	516441	452230	1.8531e+06	2.78527e+06	973563	1.26541	0.117661	3.85673
MWStz208	C18H19NO5	N-Feruloyloctopamine	Alkaloids	Phenolamine	66648-44-0	1	1.93308	up	518589	583516	744489	2.115e+06	3.50622e+06	1.43039e+06	1.29117	0.103058	3.81871
mws1174	C17H14O6	3-O-Acetylpinobanksin	Flavonoids	Flavanonols	52117-69-8	2	1.93094	up	4974.32	3101.09	2870.99	14376.9	13981.7	13380.3	1.36526	0.00124001	3.81302
pmn001381	C15H26O9	Eucommioside	Terpenoids	Terpene	-	1	1.92691	up	466715	425984	350878	1.27525e+06	1.6028e+06	1.85051e+06	1.38118	0.0167968	3.80239
Zblp005777	C18H19NO4	N-trans-ferulicacidacylp-hydroxyphenylethylamine	Alkaloids	Phenolamine	-	1	1.91492	up	6.60026e+06	4.53437e+06	7.42514e+06	1.9452e+07	2.60822e+07	2.44536e+07	1.36411	0.00598763	3.77094
MW0151054	C28H32N6O8	His-Phe-Tyr-Asp	Amino acids and derivatives	Amino acids and derivatives	-	3	1.91069	up	2394.9	1692	8926.35	16459.4	16503	15965.9	1.18989	0.034449	3.75988
MW0156668	C17H32N8O8	Ser-Asn-Thr-Arg	Amino acids and derivatives	Amino acids and derivatives	-	3	1.90109	up	8265.08	11523.7	9722.86	17562.5	47402.9	45258.9	1.23922	0.106029	3.73494
Cmmp006152	C29H44O5	Norarjunolic acid	Terpenoids	Triterpene	60393-90-0	3	1.88708	up	32398.6	9480.8	19785.2	60132.2	72528.7	95426.9	1.23689	0.0153708	3.69885
pmb3142	C13H16O8	Salicylic acid-2-O-glucoside	Phenolic acids	Phenolic acids	10366-91-3	3	1.88384	up	4.7314e+06	3.53046e+06	3.13648e+06	1.42974e+07	1.49064e+07	1.28625e+07	1.38215	0.000256436	3.69057
MW0017099	C18H28O3	9s,13r-12-Oxophytodienoic Acid	Lipids	Free fatty acids	-	3	1.87918	up	61514.1	46287.9	52900.8	169950	181519	239704	1.38081	0.0185395	3.67867
MWStz221	C18H19NO4	N-Cis-Feruloyltyramine	Alkaloids	Phenolamine	80510-09-4	3	1.87723	up	6.29146e+06	3.94076e+06	9.27318e+06	2.14926e+07	2.4807e+07	2.53572e+07	1.32033	0.00114822	3.67369
mws1433	C18H19NO4	N-Feruloyltyramine; Moupinamide	Alkaloids	Phenolamine	66648-43-9	1	1.85496	up	5.58439e+06	5.15035e+06	9.29101e+06	2.00181e+07	2.52849e+07	2.71384e+07	1.34558	0.00428389	3.61741
mws0093	C10H12O3	Coniferyl alcohol	Phenolic acids	Phenolic acids	458-35-5	3	1.85248	up	5210.91	3758.77	6327.55	11198.5	27016.6	17026.3	1.27133	0.0986423	3.6112
Zblp005760	C18H21NO4	dihydro-N-feruloyltyramine	Alkaloids	Phenolamine	-	3	1.8514	up	29155.6	32883.9	77024.2	150548	163069	188194	1.28534	0.00425788	3.6085
Lskp211210	C21H36O5	Sapidisin E	Terpenoids	Ditepenoids	-	1	1.82818	up	13741.8	12312.1	9804.48	38095.7	37823.3	51410.1	1.37627	0.016141	3.55089
Lmbn001981	C7H6O3	2,5-Dihydroxybenzaldehyde	Phenolic acids	Phenolic acids	1194-98-5	1	1.82689	up	214815	229637	199789	660754	579584	1.04525e+06	1.35341	0.0620147	3.54772
pme1109	C5H5N5O	Guanine	Nucleotides and derivatives	Nucleotides and derivatives	73-40-5	2	1.82111	up	677878	705799	637594	2.34172e+06	1.97585e+06	2.82463e+06	1.39079	0.0195615	3.53352
pmn001727	C24H29NO9	N-(4-O-(Glucosyl)-E-feruloyl)-tyramine	Alkaloids	Phenolamine	-	1	1.81769	up	1.51847e+06	482186	951762	3.54854e+06	3.28372e+06	3.57545e+06	1.26265	0.00915734	3.52515
Hmqp005455	C18H32O3	15(R)-Hydroxylinoleic Acid	Lipids	Free fatty acids	177931-23-6	3	1.80342	up	109264	107421	52094	304573	329829	303764	1.31914	0.002292	3.49047
Lmzn106284	C30H48O4	2,3-Dihydroxylup-20(29)-en-28-oic acid (Alphitolic acid)	Terpenoids	Triterpene	19533-92-7	3	1.79462	up	11581.3	50094	25829.8	90705.4	108031	104839	1.21071	0.011743	3.46923
mws1610	C30H48O4	2,3-Dihydroxyurs-12-en-29-oic acid (Maslinic acid)	Terpenoids	Triterpene	4373-41-5	3	1.79462	up	11581.3	50094	25829.8	90705.4	108031	104839	1.21071	0.011743	3.46923
Wafp005168	C19H19NO5	N-Feruloylphenylalanine	Alkaloids	Phenolamine	-	3	1.78536	up	75383.4	82930.1	87890.8	188032	183788	476854	1.23316	0.174056	3.44703
MW0156047	C25H43N5O9	Pro-Val-Glu-Thr-Leu	Amino acids and derivatives	Amino acids and derivatives	-	3	1.75596	up	123369	110715	100596	376093	400242	354053	1.40056	0.00045024	3.37752
MW0152331	C24H34N4O10	Leu-Glu-Tyr-Asp	Amino acids and derivatives	Amino acids and derivatives	-	3	1.7536	up	149527	176954	117578	583717	416460	497190	1.36828	0.0111738	3.372
Zmyn004676	C18H30O3	17-Hydroxylinolenic acid	Lipids	Free fatty acids	-	2	1.75338	up	512014	292595	244017	1.01547e+06	1.09281e+06	1.42714e+06	1.31157	0.00818747	3.37147
MW0149995	C22H38N6O11	Glu-Glu-Lys-Ser-Ala	Amino acids and derivatives	Amino acids and derivatives	-	3	1.74447	up	6260.61	10022.9	8948.75	28312.2	27901.7	28332.3	1.37599	0.00281804	3.35071
pme0075	C7H11NO5	N-Acetyl-L-glutamic acid	Amino acids and derivatives	Amino acids and derivatives	1188-37-0	3	1.73653	up	19953.7	16279	12800.8	55882.3	38843.2	68670.7	1.33017	0.0413481	3.33233
mws0749	C7H6O3	4-Hydroxybenzoic acid	Phenolic acids	Phenolic acids	99-96-7	2	1.73281	up	389315	439444	430735	1.30314e+06	1.05817e+06	1.82492e+06	1.36066	0.0491331	3.32374
Wafp003601	C16H24N4O3	N-Feruloylmethylagmatine	Alkaloids	Phenolamine	-	2	1.73175	up	372297	151255	224209	829293	651521	1.00273e+06	1.27799	0.0127552	3.32131
Wccp005403	C18H19NO4	Acetyl-Caranine	Alkaloids	Alkaloids	-	1	1.73172	up	7.19798e+06	4.26419e+06	9.81913e+06	2.07624e+07	2.33044e+07	2.66134e+07	1.3055	0.00214919	3.32123
MWSmce324	C11H6O3	Psoralen	Lignans and Coumarins	Coumarins	66-97-7	3	1.70425	up	69023.9	60883.3	59438.2	262052	81429.9	273516	1.12376	0.148697	3.25859
MW0146254	C18H32N6O9	Asp-Ser-Gln-Lys	Amino acids and derivatives	Amino acids and derivatives	-	3	1.69478	up	475709	238356	394921	1.1377e+06	1.34552e+06	1.10688e+06	1.32575	0.00130197	3.23728
pmn001694	C18H34O5	9,10,13-Trihydroxy-11-Octadecenoic Acid	Lipids	Free fatty acids	29907-57-1	3	1.66739	up	273826	249995	205211	619840	735522	960331	1.36268	0.0298257	3.17639
mws1550	C6H11NO2S	S-Allyl-L-cysteine	Amino acids and derivatives	Amino acids and derivatives	21593-77-1	2	1.6549	up	120252	193073	187344	424959	503516	648144	1.33797	0.0216603	3.14902
MW0147979	C13H24N6O6S1	Cys-Arg-Asp	Amino acids and derivatives	Amino acids and derivatives	-	3	1.65108	up	62370.7	29893.3	42574	70166.7	154886	198433	1.16004	0.117536	3.1407
Hmln000659	C13H16O10	3-O-Galloyl-D-glucose	Phenolic acids	Phenolic acids	-	3	1.64094	up	13646.3	14474.1	23483.7	40245.1	66325	54367.5	1.31315	0.0265423	3.1187
Lmfn000604	C13H16O10	6-O-Galloyl-β-D-glucose	Phenolic acids	Phenolic acids	13186-19-1	3	1.64094	up	13646.3	14474.1	23483.7	40245.1	66325	54367.5	1.31315	0.0265423	3.1187
Lmsn001014	C13H16O10	1-O-Galloyl-β-D-glucose	Phenolic acids	Phenolic acids	58511-73-2	3	1.64094	up	13646.3	14474.1	23483.7	40245.1	66325	54367.5	1.31315	0.0265423	3.1187
MW0151674	C12H24N2O3	Ile-Leu	Amino acids and derivatives	Amino acids and derivatives	26462-22-6	3	1.62039	up	14753.4	18912.3	23581.3	43118.5	63180.3	69711.8	1.33023	0.0292124	3.07458
Zmpn003368	C18H30O3	13S-Hydroxy-9Z,11E,15Z-octadecatrienoic acid	Lipids	Free fatty acids	87984-82-5	2	1.61284	up	49830.4	24234.7	27445.1	88172.3	99290.4	123011	1.29843	0.00693774	3.05854
pmn001498	C33H44N2O3	Isodendrocrepine	Alkaloids	Alkaloids	50906-94-0	1	1.60924	up	208400	236756	202039	452386	701529	820616	1.33653	0.0539146	3.05091
Qmxp101615	C22H36O3	Ent-3β-Acetoxyisopimar-15-8β-ol	Terpenoids	Ditepenoids	-	2	1.60182	up	213258	212097	216769	540026	642768	766224	1.38751	0.0217549	3.03527
MW0155200	C20H23N3O5	Phe-Gly-Tyr	Amino acids and derivatives	Amino acids and derivatives	-	3	1.59795	up	128440	154528	96014.6	351072	402813	393343	1.36629	0.00039263	3.02713
pmn001497	C33H44N2O3	Dendrocrepine	Alkaloids	Alkaloids	51020-39-4	1	1.58753	up	202332	233478	197327	521765	619931	761094	1.37801	0.0234612	3.00534
Zmbn005559	C16H18N2O5S	Indole-3-cyano-2-O-glucoside	Alkaloids	Plumerane	-	3	1.58004	up	87848.5	126349	94287.9	322092	312243	287972	1.38148	0.000228921	2.98979
pmb2640	C12H24O2	Dodecanoic acid (Lauric acid)	Lipids	Free fatty acids	143-07-7	3	1.56624	up	145347	104664	104409	322507	287450	439595	1.34635	0.0290584	2.96132
MW0155943	C16H25N5O4S1	Pro-Met-His	Amino acids and derivatives	Amino acids and derivatives	-	3	1.558	up	199100	193810	189249	542036	534029	638076	1.40219	0.00742087	2.94446
Lmbn003970	C18H34O5	9,12,13-TriHOME; 9(S),12(S),13(S)-Trihydroxy-10(E)-octadecenoic acid	Lipids	Free fatty acids	97134-11-7	1	1.52914	up	27264.6	30939.2	25125.6	62243	76023.1	102233	1.35225	0.0440985	2.88613
Hmcp002187	C23H24O13	Limocitrin-3-O-galactoside	Flavonoids	Flavonols	-	3	1.52227	up	24012.8	16489.3	20244.2	61559.2	57015.8	55914	1.37793	0.000224689	2.87242
mws0267	C3H6O4	DL-Glyceric Acid	Organic acids	Organic acids	473-81-4	3	1.52049	up	94962.3	110573	97421.8	267185	264092	337872	1.38994	0.0132164	2.86889
pmf0297	C20H42O	1-Eicosanol	Lipids	Free fatty acids	629-96-9	3	1.51695	up	28366.3	20069.3	22771.1	65895	56160.6	81728	1.35628	0.0191003	2.86186
pma6460	C16H18O8	4-O-p-Coumaroylquinic acid	Phenolic acids	Phenolic acids	32451-86-8	3	1.51024	up	14889.7	32834.9	38727.4	62152.3	96355.8	87757.7	1.22094	0.0166542	2.84858
MW0144747	C19H37N5O6	Ala-Thr-Ile-Lys	Amino acids and derivatives	Amino acids and derivatives	-	3	1.49965	up	766162	597396	822012	2.27531e+06	2.11095e+06	1.79395e+06	1.373	0.00404073	2.82774
Lmmp002013	C14H22N2O3	Dihydroferuloylputrescine	Alkaloids	Phenolamine	-	1	1.49638	up	164059	203727	279688	623117	555364	648267	1.35028	0.00101958	2.82134
Hmln003169	C21H24O7	Trachelogenin	Lignans and Coumarins	Lignans	34209-69-3	3	1.49143	up	8606.7	6336.49	5401.69	15567.1	19459.9	22176	1.33864	0.0112212	2.81167
Hmmp002150	C19H19NO5	3,5-Bis(3-methoxy-4-hydroxyphenyl)-2,3-dihydro-2(1H)-pyridinone	Alkaloids	Pyridine alkaloids	-	3	1.49139	up	114907	70461.5	123684	219871	175659	473404	1.14519	0.17852	2.81161
Lmzn006284	C30H48O4	2-Hydroxyursolic acid	Terpenoids	Triterpene	-	3	1.4885	up	73358.2	70534.7	40038.1	159863	161056	195187	1.31474	0.00220921	2.80598
Lmbp002309	C17H22O9	Sinapaldehyde-4-O-Glucoside	Phenolic acids	Phenolic acids	154461-65-1	3	1.48488	up	16988.1	29022.8	25104.1	80463.5	58228.7	60354.8	1.32745	0.0131959	2.79894
Hmgn001653	C7H6O3	Protocatechualdehyde	Phenolic acids	Phenolic acids	139-85-5	2	1.47171	up	233345	306364	219420	732113	590785	782550	1.36667	0.00691761	2.77351
Wagn011658	C31H58O14	1-Palmitoyl-Sn-Glycerol 3-O-Diglucoside	Lipids	Glycerol ester	-	2	1.46022	up	52734.1	57042.3	48530.1	144339	131584	159656	1.39664	0.00448596	2.7515
Wagn012030	C31H58O14	2-Palmitoyl-Sn-Glycerol 3-O-Diglucoside	Lipids	Glycerol ester	-	2	1.45864	up	46102.4	40248.8	43962	118585	115405	124176	1.40416	4.90526e-05	2.7485
MWSmce248	C9H8O3	3-Hydroxycinnamic Acid	Phenolic acids	Phenolic acids	14755-02-3	3	1.44955	up	667821	702896	568292	1.69763e+06	1.55658e+06	2.04166e+06	1.3825	0.0114622	2.73122
Lmbn002648	C9H8O3	α-Hydroxycinnamic Acid	Phenolic acids	Phenolic acids	5801-57-0	1	1.44955	up	667821	702896	568292	1.69763e+06	1.55658e+06	2.04166e+06	1.3825	0.0114622	2.73122
Lmmn001643	C9H8O3	2-Hydroxycinnamic acid	Phenolic acids	Phenolic acids	583-17-5	1	1.44955	up	667821	702896	568292	1.69763e+06	1.55658e+06	2.04166e+06	1.3825	0.0114622	2.73122
Wasn003821	C16H30O8	Glucosyl 3,7-dimethyloct-2-ene-1,6,7-triol	Others	Others	-	1	1.44538	up	28261.3	26395.2	34618.3	85335.2	69245.4	88546.1	1.37676	0.00625045	2.72335
pme1439	C9H8O3	p-Coumaric acid	Phenolic acids	Phenolic acids	501-98-4	3	1.44462	up	79866.8	133331	51346.2	227868	227541	264657	1.25248	0.0112898	2.72191
Wafp004641	C24H29NO9	N-Feruloyltyramine 4-glucoside	Alkaloids	Phenolamine	-	1	1.44436	up	2.90753e+06	1.31371e+06	2.0608e+06	5.75835e+06	5.29613e+06	6.04161e+06	1.28579	0.00685476	2.72142
Lskp211409	C27H44O8	Ergosta-5,24(28)-diene-3,20,26-triol (Podecdysone C)	Steroids	Steroid	19458-46-9	2	1.43594	up	7232.03	4854.71	7906.05	15819.5	15377.4	22895.4	1.31108	0.0304996	2.70559
Waln013216	C18H36O3	10-Hydroxystearic Acid	Lipids	Free fatty acids	638-26-6	1	1.43113	up	3625.43	2051.6	3960.66	9443.21	6201.68	10344	1.25247	0.0325834	2.69659
Zbxp002648	C16H25NO9	simmondsin	Others	Others	51771-52-9	2	1.42879	up	113027	163789	194936	474998	299856	495205	1.28466	0.0368058	2.69221
Lmsn002247	C13H16O8	1-O-Salicyloyl-β-D-glucose	Phenolic acids	Phenolic acids	60517-74-0	1	1.41766	up	1.79288e+06	1.90875e+06	1.87646e+06	5.76204e+06	4.00145e+06	5.13852e+06	1.37661	0.0259718	2.67152
MW0158702	C22H22N4O7	TyrMe-His-OH	Amino acids and derivatives	Amino acids and derivatives	-	3	1.4152	up	128149	116994	131713	368982	347444	288634	1.38965	0.0108689	2.66696
mws1668	C11H6O3	Angelicin	Lignans and Coumarins	Coumarins	523-50-2	3	1.41496	up	63738.6	53177.7	57799.1	191148	64364.9	210370	1.05425	0.167671	2.66653
Zahp005843	C19H21NO5	N-Trans-Sinapoyltyramine	Alkaloids	Alkaloids	200125-11-7	2	1.40578	up	99871.8	71619.3	71157.5	148228	272570	222125	1.28835	0.0578369	2.64961
pmb3074	C16H18O8	5-O-p-Coumaroylquinic acid	Phenolic acids	Phenolic acids	1899-30-5	2	1.39076	up	3.95825e+06	3.87494e+06	4.22108e+06	1.01736e+07	1.04338e+07	1.10008e+07	1.40672	0.000293497	2.62216
Lmmn009932	C31H50O3	3-Hydroxy-24-methylene-9,19-cyclolanostan-26-oic acid (Ambolic acid)	Terpenoids	Triterpene	13878-93-8	3	1.37967	up	4322.06	4014.48	3528.55	8652.59	9917.77	12303.7	1.36858	0.0232101	2.60209
mws0180	C7H6O4	2,5-Dihydroxybenzoic acid; Gentisic Acid	Phenolic acids	Phenolic acids	490-79-9	3	1.37778	up	155409	438944	234375	820395	678481	654728	1.21611	0.0169736	2.59869
mws0983	C20H39NO2	N-Oleoylethanolamine	Alkaloids	Alkaloids	111-58-0	3	1.36488	up	34319.4	43661	22102.5	65703.2	81920.5	110145	1.25382	0.0380666	2.57556
MW0149998	C30H45N5O10	Glu-Glu-Phe-Leu-Val	Amino acids and derivatives	Amino acids and derivatives	-	3	1.34884	up	62047.3	65103.8	43650.8	130388	123524	181135	1.32308	0.0283732	2.54708
Lmbn007891	C18H34O4	Hydroxy ricinoleic acid	Lipids	Free fatty acids	-	1	1.34866	up	10705.1	9210.38	10000.8	22862.4	26638.8	26688.4	1.39516	0.00336202	2.54676
Wmln000659	C10H10O4	3-Methyl-4,8-dihydroxy-3,4-dihydroisocoumarin	Lignans and Coumarins	Coumarins	33788-22-6	3	1.34794	up	65812	82950.6	109787	204333	226773	227027	1.34522	0.00215606	2.54548
pmb2601	C15H16O7	7-Hydroxycoumarin-O-rhamnoside	Lignans and Coumarins	Coumarins	-	3	1.34582	up	29572.2	8775.48	14293.1	48305.9	39864.8	45629.2	1.16267	0.0349788	2.54175
MW0151077	C11H17N5O5	His-Ser-Gly	Amino acids and derivatives	Amino acids and derivatives	-	3	1.34453	up	2.31019e+06	1.11422e+06	1.30464e+06	5.55925e+06	2.65792e+06	3.79216e+06	1.1766	0.0858054	2.53948
Lmzn006795	C30H46O3	3-Oxours-12-en-28-oic acid (Ursonic acid)	Terpenoids	Triterpene	6246-46-4	3	1.33961	up	20295.4	25592	27107.1	66068.7	47858.8	70809.2	1.34357	0.0257572	2.53083
mws1627	C14H16O9	Bengenin	Phenolic acids	Phenolic acids	477-90-7	3	1.31373	up	40172.4	46981	38520.6	123905	92723.5	95776	1.37111	0.0190871	2.48583
pmb3066	C22H26O12	5-O-p-Coumaroylshikimic acid O-glucoside	Phenolic acids	Phenolic acids	-	2	1.29422	up	57337.8	44847.1	40851.4	112749	113530	124510	1.37197	0.000536678	2.45245
MW0151683	C15H22N2O3	Ile-Phe	Amino acids and derivatives	Amino acids and derivatives	-	3	1.27559	up	224985	295442	229058	406762	659314	748418	1.27442	0.0676272	2.42099
Zmjp003291	C27H30O15	Vitexin-2''-O-galactoside	Flavonoids	Flavones	-	3	1.26119	up	8554.64	17171.8	7401.35	33601.8	22943	22860.2	1.19929	0.0316791	2.39693
pmn001421	C16H18O8	3-O-p-Coumaroylquinic acid	Phenolic acids	Phenolic acids	87099-71-6	1	1.26075	up	3.5603e+06	4.97559e+06	4.83087e+06	1.00753e+07	1.11086e+07	1.08455e+07	1.36973	0.000637647	2.3962
Hmqp006235	C26H46NO7P	LysoPC 18:4	Lipids	LPC	-	1	1.25843	up	226152	167852	171185	491302	373528	487306	1.34903	0.00968342	2.39236
Lmbn009444	C18H34O3	Ricinoleic acid	Lipids	Free fatty acids	141-22-0	2	1.25298	up	26249.6	24225.8	28235.7	60717.2	52123	74753.8	1.36415	0.0283918	2.38332
MWS201447	C12H16N2O3	Phe-Ala	Amino acids and derivatives	Amino acids and derivatives	3918-87-4	2	1.23847	up	37161.1	18388.4	11519.5	49173.6	46534.5	62539.7	1.13705	0.0367537	2.35948
Lmbn005487	C18H34O4	12,13-DHOME; (9Z)-12,13-Dihydroxyoctadec-9-enoic acid	Lipids	Free fatty acids	263399-35-5	1	1.23001	up	82256.5	85523.8	92681.1	189653	193841	227466	1.39378	0.00727137	2.34568
MW0144721	C19H24N4O4	Ala-Pro-Trp	Amino acids and derivatives	Amino acids and derivatives	-	3	1.21588	up	26334.1	22773.9	13876.3	50178	31715.4	64408.6	1.16759	0.0841094	2.32283
Smnp002432	C24H24O12	6'-Malonylnataloin	Quinones	Anthraquinone	-	3	1.20896	up	19009.7	17275.2	19018.6	50408.1	42602.6	34834.9	1.36026	0.0311056	2.31171
MWS0611	C6H12N2O3	D-Alanyl-D-Alanine	Amino acids and derivatives	Amino acids and derivatives	923-16-0	3	1.19807	up	8137.78	5712.87	6992.19	15237.3	23239.8	9343.16	1.13437	0.151525	2.29432
Lmzp003207	C16H28O7	(3R,4R)-p-Menth-1-ene-3,4-diol-3-O-β-D-glucoside	Others	Alcohol compounds	-	3	1.19112	up	21405.9	30667.6	34572.9	67768	45938.8	84132.4	1.23418	0.0654754	2.2833
MWSHC20109	C9H6O2	Coumarin	Lignans and Coumarins	Coumarins	91-64-5	2	1.18992	up	108424	128590	158649	292836	222923	386909	1.27562	0.060075	2.2814
MWS5235	C18H36O3	12-Hydroxyoctadecanoic acid	Lipids	Free fatty acids	106-14-9	2	1.18829	up	20220.3	16036.6	16148.9	32503.2	41791.1	45129.8	1.34802	0.0179355	2.27883
pmp001190	C37H38N2O9	(5-8)-Hydroxy-1-(hydroxylmethoxyphenyl)-N2,N3-bis(4-hydroxyphenethyl)-(5-8)-dimethoxy-1,2-dihydronaphthalene-2,3-dicarboxamide	Alkaloids	Phenolamine	-	3	1.17735	up	3324.33	6730.94	11869.7	12418.7	19299.8	17867.2	1.07959	0.0485586	2.26161
Hmqp006023	C20H36O3	Ethyl 9-Hydroxy-10,12-octadecadienoic acid	Lipids	Free fatty acids	-	3	1.1643	up	2546.38	4257.14	2405.73	4946.45	5018.88	10674.8	1.10166	0.174255	2.24124
Zasn010433	C20H36O2	9,12-Octadecadienoic acid,ethyl ester	Others	Others	6114-21-2	2	1.15156	up	249626	221252	196906	407152	455043	621308	1.32477	0.0461333	2.22153
pmn001610	C20H36O2	Eicosadienoic acid	Lipids	Free fatty acids	5598-38-9	3	1.14127	up	570122	532779	512806	1.0655e+06	1.09675e+06	1.40161e+06	1.37314	0.0239103	2.20576
mws0885	C7H6O4	2,4-Dihydroxybenzoic acid	Phenolic acids	Phenolic acids	89-86-1	2	1.13272	up	320443	299895	323128	704307	581738	782712	1.37446	0.0220424	2.19272
pmb3042	C23H24O12	Tricin-5-O-Glucoside	Flavonoids	Flavones	32769-00-9	3	1.13272	up	199916	154462	142417	466045	315755	307528	1.29121	0.0497476	2.19271
mws0264	C12H22O11	D-Trehalose	Others	Saccharides	99-20-7	3	1.12763	up	1.0934e+06	1.17817e+06	913943	2.2543e+06	2.47605e+06	2.22998e+06	1.38027	0.000338497	2.18499
MWSslk133	C14H26O4	1,14-Tetradecanedioic Acid	Lipids	Free fatty acids	821-38-5	1	1.124	up	22283.7	19006.5	23078	42279.4	41669.4	56342.2	1.35181	0.0276706	2.17951
Wbmn013660	C20H32O4	3,9-Dihydroxy-13(14)-labden-16,15-olide	Terpenoids	Ditepenoids	-	1	1.12333	up	19554.2	20964.1	17083.6	48017.6	40890.8	36576.8	1.36596	0.0136486	2.17849
Lmlp003161	C14H20N2O3	N-Feruloylputrescine	Alkaloids	Phenolamine	501-13-3	1	1.09519	up	1.98848e+07	1.72255e+07	1.89397e+07	3.8074e+07	3.68142e+07	4.48575e+07	1.38369	0.00863275	2.13641
MWSmce096	C15H22O	Nootkatone	Terpenoids	Sesquiterpenoids	4674-50-4	3	1.09128	up	31651.9	56228	55849	129021	60134	117078	1.08937	0.111906	2.13063
Wafp002146	C13H15NO3	1-Pyrrolizino-3-(3,4-Dihydroxyphenyl)-2-Propene-1-One	Alkaloids	Phenolamine	-	3	1.09074	up	66366.2	47802.2	34847.2	114283	93773.4	109321	1.26119	0.00993114	2.12983
MW0156918	C17H31N7O9	Ser-Thr-Arg-Asp	Amino acids and derivatives	Amino acids and derivatives	-	3	1.08592	up	125384	156242	136162	360785	277941	248123	1.33416	0.0359946	2.12272
MW0145491	C17H31N7O8	Arg-Ser-Ala-Glu	Amino acids and derivatives	Amino acids and derivatives	-	3	1.08584	up	689043	819457	645655	1.69923e+06	1.53555e+06	1.33766e+06	1.36393	0.00665982	2.12261
Zmdp000917	C6H13N3O2	δ-Guanidinovaleric acid	Organic acids	Organic acids	462-93-1	3	1.08472	up	26150.3	44677.5	41871.3	70812.1	67777.2	100442	1.24022	0.0361322	2.12097
pmb0323n	C13H18N2O3	N-Caffeoylputrescine	Alkaloids	Phenolamine	29554-26-5	1	1.07777	up	644714	432496	640136	1.25956e+06	1.1235e+06	1.24186e+06	1.32528	0.00312624	2.11077
mws0396	C18H34O2	Elaidic Acid	Lipids	Free fatty acids	112-79-8	3	1.06766	up	9.27217e+06	1.20444e+07	9.87338e+06	1.97649e+07	2.297e+07	2.26402e+07	1.37056	0.00115721	2.09603
Lmyn012331	C18H34O2	Petroselinic acid	Lipids	Free fatty acids	593-39-5	3	1.06766	up	9.27217e+06	1.20444e+07	9.87338e+06	1.97649e+07	2.297e+07	2.26402e+07	1.37056	0.00115721	2.09603
MWSslk086	C16H28O	Ambroxide	Terpenoids	Ditepenoids	6790-58-5	3	1.05942	up	82965.3	119143	124032	185607	185677	308425	1.21913	0.0911102	2.0841
pmb2799	C18H32O3	12,13-Epoxy-9-Octadecenoic Acid	Lipids	Free fatty acids	6799-85-5	2	1.05508	up	14993.9	14872.7	14894.5	26293.1	31547.4	35165.4	1.37359	0.0246859	2.07783
pmn001371	C27H34O12	Eucommin A	Lignans and Coumarins	Lignans	99633-12-2	3	1.05216	up	221222	151467	219667	432504	334566	461261	1.29293	0.0145734	2.07363
Hmhp001812	C11H15N5O4	2'-O-Methyladenosine	Nucleotides and derivatives	Nucleotides and derivatives	2140-79-6	1	1.04745	up	265151	324642	278006	571807	556164	665656	1.37697	0.00392847	2.06687
Lmtn002233	C15H20O8	Androsin	Phenolic acids	Phenolic acids	531-28-2	1	1.04217	up	9.92949e+06	8.42655e+06	1.06356e+07	2.12529e+07	1.87867e+07	1.96633e+07	1.37784	0.000485647	2.05932
Lmyn006011	C33H58O14	Gingerglycolipid B	Lipids	Glycerol ester	88168-90-5	2	1.0374	up	28588.7	29938.7	30362	44161.2	63293	74993.5	1.28654	0.0734318	2.05252
Wbjp001557	C12H14N2O	tetrahydroharmol	Alkaloids	Alkaloids	17952-75-9	1	1.0357	up	4.50391e+06	4.23388e+06	5.1717e+06	8.80607e+06	9.58278e+06	1.01272e+07	1.38299	0.000796409	2.05011
Lmjp003090	C17H20O10	Isofraxidin-7-O-glucoside	Lignans and Coumarins	Coumarins	483-91-0	3	1.03491	up	21366.2	26584.2	21326.3	49181.8	51118.2	41646.7	1.36266	0.00407633	2.04899
pmb2791	C18H30O4	9-Hydroperoxy-10E,12,15Z-octadecatrienoic acid	Lipids	Free fatty acids	111004-08-1	3	1.03058	up	22837.4	22420.8	21285.9	42856.9	36924.1	56158.1	1.32987	0.0545705	2.04284
Zmhn002750	C22H22O11	4-O-(6'-O-Glucosylcaffeoyl)-4-hydroxybenzoic acid	Phenolic acids	Phenolic acids	-	3	1.02895	up	364095	376567	417824	735133	736009	892790	1.37956	0.0110071	2.04054
pme1975	C3H4O4	Malonic acid	Organic acids	Organic acids	141-82-2	3	1.02865	up	291003	149459	419049	591441	576219	585842	1.12152	0.0615304	2.04011
Hmln002355	C27H34O12	5'-Methoxymatairesinoside	Lignans and Coumarins	Lignans	1691201-82-7	3	1.0234	up	158969	93343.5	175758	268341	252076	349723	1.20739	0.0211523	2.0327
pmn001380	C9H16O4	Eucommiol	Others	Alcohol compounds	55930-44-4	1	1.01372	up	170954	144239	129456	386145	209581	302073	1.22201	0.0903463	2.01911
Wafn011890	C14H30O5S	Hydroxytetradecyl sulfate	Others	Others	-	3	1.01352	up	4939.1	6033.26	4484.26	8032.01	10669.4	12502.9	1.28806	0.0435582	2.01883
pmp001073	C9H13NO2	Synephrine; 4-[1-Hydroxy-2-(methylamino)ethyl]phenol	Alkaloids	Phenolamine	94-07-5	3	1.00426	up	718711	763970	565823	1.32372e+06	1.31144e+06	1.47396e+06	1.35808	0.00107268	2.00591
mws2623	C18H34O2	11-Octadecanoic acid(Vaccenic acid)	Lipids	Free fatty acids	506-17-2	3	1.00379	up	9.29622e+06	1.25651e+07	10351573	2.00514e+07	2.23652e+07	2.21788e+07	1.36355	0.00118102	2.00526
pme1286	C14H20N6O5S	S-(5'-Adenosy)-L-homocysteine	Amino acids and derivatives	Amino acids and derivatives	979-92-0	3	1.0029	up	36312.8	38645.2	41969.2	77953	68517.2	87855.5	1.37258	0.0139956	2.00403
