# Supplementary material for: Feruloyl Glyceride Mitigates Tomato Postharvest Rot by Inhibiting Penicillium expansum Spore Germination and Enhancing Suberin Accumulation
Source: Foods. 2024 Apr 10;13(8):1147. doi: 10.3390/foods13081147 (PMC11049243; doi:10.3390/foods13081147)
Supplement: Supplementary file 1 [file foods-13-01147-s001.zip › Table S4. DEGs with up-regulated expression.xlsx]

## Sheet: Sheet1
Gene ID	Gene name	log2FC	gene_description	regulated
Solyc05g056170.3	SlPAL1	3.56	Phenylalanine ammonia-lyase	up
Solyc07g045290.3	SlLACS8	1.98	Long chain acyl-CoA synthetase	up
Solyc11g067170.2	SlFAR4	1.12	Fatty acyl-CoA reductase	up
Solyc03g005320.3	SlKCS11	4.86	3-ketoacyl-CoA synthase	up
Solyc06g076800.3	SlCYP86A1	7.2	Cytochrome P450 86A1	up
Solyc02g014730.3	SlCYP86B1	4.11	Cytochrome P450 86B1	up
Solyc04g011600.3	SlGPAT5	8.49	Glycerol-3-phosphate acyltransferase	up
Solyc02g078650.3	SlPPO	6.42	Polyphenol oxidase	up
Solyc08g029000.3	SlLOX5	3.89	Lipoxygenase	up
Solyc01g099620.3	SlRbohB	2.08992	Respiratory burst oxidase homolog protein B	up
