# Supplementary material for: Feruloyl Glyceride Mitigates Tomato Postharvest Rot by Inhibiting Penicillium expansum Spore Germination and Enhancing Suberin Accumulation
Source: Foods. 2024 Apr 10;13(8):1147. doi: 10.3390/foods13081147 (PMC11049243; doi:10.3390/foods13081147)
Supplement: Supplementary file 1 [file foods-13-01147-s001.zip › Table S5. DEGs in the suberin synthesis pathway.xlsx]

## Sheet: Sheet1
gene_name	CK-1_count	CK-2_count	FG-1_count	FG-2_count	CK-1_value	CK-2_value	FG-1_value	FG-2_value
Solyc05g056170.3	29	25	425	419	-0.98	-1	1	0.97
Solyc09g007910.3	2155	1788	5280	3788	-0.789805	-1	1	0.145475
Solyc04g011600.3	0	0	71	98	-1	-1	0.44898	1
Solyc01g094700.3	61	74	137	139	-1	-0.666667	0.948718	1
Solyc08g082340.3	1017	975	1219	1433	-0.816594	-1	0.0655022	1
Solyc08g008310.3	255	254	385	458	-0.990196	-1	0.284314	1
Solyc08g082280.3	2875	3138	4320	4449	-1	-0.66582	0.836086	1
Solyc07g045290.3	3167	3183	4028	4313	-1	-0.972077	0.502618	1
Solyc03g005320.3	3	2	131	130	-0.984496	-1	1	0.984496
Solyc08g067410.2	41	49	292	264	-1	-0.936255	1	0.776892
Solyc10g009240.3	24	28	160	176	-1	-0.947368	0.789474	1
Solyc06g068650.3	5	3	69	62	-0.939394	-1	1	0.787879
Solyc03g097030.3	18	15	72	85	-0.914286	-1	0.628571	1
Solyc03g111170.3	462	566	2029	2028	-1	-0.867262	1	0.998724
Solyc11g067170.2	101	72	274	285	-0.7277	-1	0.896714	1
Solyc06g076800.3	0	1	108	55	-1	-0.981481	1	0.0185185
Solyc02g014730.3	3	1	49	67	-0.939394	-1	0.454545	1
Solyc01g094750.3	16	13	35	41	-0.785714	-1	0.571429	1
