# Supplementary material for: Feruloyl Glyceride Mitigates Tomato Postharvest Rot by Inhibiting Penicillium expansum Spore Germination and Enhancing Suberin Accumulation
Source: Foods. 2024 Apr 10;13(8):1147. doi: 10.3390/foods13081147 (PMC11049243; doi:10.3390/foods13081147)
Supplement: Supplementary file 1 [file foods-13-01147-s001.zip › Table S6. DMs in suberin synthesis pathway.xlsx]

## Sheet: Sheet1
Index	Formula	Compounds	CK-1_count	CK-2_count	FG-1_count	FG-2_count	CK-1_value	CK-2_value	FG-1_value	FG-2_value
mws0093	C10H12O3	Coniferyl alcohol	5210.91	3758.77	27016.6	17026.3	-0.875126	-1	1	0.140914
Jmzn006005	C10H10O3	3,4-Methylenedioxy cinnamyl alcohol	35430.3	33563.8	68034.9	61591	-0.891704	-1	1	0.626127
MWS201447	C12H16N2O3	Phe-Ala	18388.4	11519.5	49173.6	62539.7	-0.730739	-1	0.476048	1
mws0636	C18H20N2O3	L-Phenylalanyl-L-phenylalanine	21370.5	25174	53022.5	54545.6
mws1024	C9H8O2	p-Coumaraldehyde	1115.61	649.503	32196.2	33437.3	-0.971568	-1	0.924299	1
pme1439	C9H8O3	p-Coumaric acid	79866.8	51346.2	227868	227541	-0.67686	-1	1	0.996301
MWSmce248	C9H8O3	3-Hydroxycinnamic Acid	667821	568292	1.69763e+06	2.04166e+06	-0.864895	-1	0.533008	1
MWS20182	C10H12O4	Dihydroferulic Acid	139610	122659	175211	196623	-0.54164	-1	0.421005	1
mws0014	C10H10O4	Ferulic acid	509424	516779	648944	592370	-1	-0.894566	1	0.189017
Wafp005168	C19H19NO5	N-Feruloylphenylalanine	75383.4	82930.1	188032	183788	-1	-0.866013	1	0.924654
Lmmp002013	C14H22N2O3	Dihydroferuloylputrescine	164059	203727	623117	648267	-1	-0.836151	0.89612	1
pmp000086	C13H16O6	1-Feruloyl-sn-glycerol	29215.5	21417.8	40959	51125.5	-0.475036	-1	0.315566	1
MWSmce083	C11H12O4	Ferulic acid methyl ester	23034.9	23231.1	25377.3	26075.5	-1	-0.870939	0.540781	1
MW0014090	C16H32O3	3-Hydroxyhexadecanoic acid	32779.5	32102.6	1.07391e+06	1.41064e+06	-0.999018	-1	0.51147	1
pmf0395	C18H34O2	Oleic acid	119167	134008	3.09214e+06	4.26008e+06	-1	-0.992832	0.435904	1
MW0102909	C18H34O2	trans-Vaccenic acid	137925	163288	3.1997e+06	4.34383e+06	-1	-0.987939	0.455944	1
pmb0889	C18H30O2	Punicic acid (9Z,11E,13Z-octadecatrienoic acid)	701537	636065	1.1167e+07	1.11395e+07	-0.987566	-1	1	0.994781
Wagn011658	C31H58O14	1-Palmitoyl-Sn-Glycerol 3-O-Diglucoside	52734.1	48530.1	144339	159656	-0.92434	-1	0.724332	1
Wagn012030	C31H58O14	2-Palmitoyl-Sn-Glycerol 3-O-Diglucoside	40248.8	43962	118585	124176	-1	-0.911515	0.866756	1
MWS5231	C13H24O4	Tridecanedioic acid	102627	93894.7	1.86231e+06	2.07569e+06	-0.991187	-1	0.784653	1
MWSslk132	C16H30O4	Hexadecanedioic acid	60496.6	64165.5	223619	242142	-1	-0.959604	0.796059	1
MWSslk133	C14H26O4	1,14-Tetradecanedioic Acid	22283.7	19006.5	42279.4	41669.4	-0.718373	-1	1	0.947572
