# Supplementary material for: Feruloyl Glyceride Mitigates Tomato Postharvest Rot by Inhibiting Penicillium expansum Spore Germination and Enhancing Suberin Accumulation
Source: Foods. 2024 Apr 10;13(8):1147. doi: 10.3390/foods13081147 (PMC11049243; doi:10.3390/foods13081147)
Supplement: Supplementary file 1 [file foods-13-01147-s001.zip › Table S7. Correlation analysis.xlsx]

## Sheet: Sheet 1
Omics_1	Omics_2	Correlation	P-Value
mws0093	Solyc05g056170.3	0.89974	0.0145742
mws0093	Solyc04g011600.3	0.903074	0.0136366
mws0093	Solyc08g082280.3	0.911949	0.0112881
mws0093	Solyc03g005320.3	0.947058	0.00413015
mws0093	Solyc08g067410.2	0.942505	0.0048634
mws0093	Solyc10g009240.3	0.83837	0.0370754
mws0093	Solyc12g006820.2	0.817839	0.0467518
mws0093	Solyc12g042460.2	0.913224	0.0109685
mws0093	Solyc06g068650.3	0.895209	0.0158963
mws0093	Solyc03g097030.3	0.862078	0.027222
mws0093	Solyc03g111170.3	0.852877	0.0308756
mws0093	Solyc02g088720.3	0.840944	0.0359361
mws0093	Solyc11g067170.2	0.850553	0.0318329
mws0093	Solyc06g076800.3	0.857521	0.0290041
mws0093	Solyc02g014730.3	0.926738	0.00785444
mws0093	Solyc02g078650.3	0.836833	0.0377631
mws0093	Solyc08g029000.3	0.829025	0.0413494
mws0093	Solyc01g099160.3	0.879139	0.0210284
mws0093	Solyc09g014350.3	-0.817446	0.0469471
Jmzn006005	Solyc05g056170.3	0.98553	0.000312541
Jmzn006005	Solyc04g011600.3	0.977487	0.000754534
Jmzn006005	Solyc08g008310.3	0.916117	0.0102595
Jmzn006005	Solyc08g082280.3	0.961933	0.00214607
Jmzn006005	Solyc07g045290.3	0.917723	0.00987585
Jmzn006005	Solyc03g005320.3	0.945096	0.00443886
Jmzn006005	Solyc08g067410.2	0.967483	0.00156882
Jmzn006005	Solyc12g006820.2	0.837065	0.0376591
Jmzn006005	Solyc06g065560.2	0.920695	0.00918447
Jmzn006005	Solyc12g042460.2	0.938608	0.00553769
Jmzn006005	Solyc06g068650.3	0.966881	0.00162718
Jmzn006005	Solyc03g097030.3	0.9678	0.00153852
Jmzn006005	Solyc03g111170.3	0.971199	0.00123227
Jmzn006005	Solyc11g067170.2	0.935535	0.00609974
Jmzn006005	Solyc02g014730.3	0.934177	0.00635641
Jmzn006005	Solyc02g078650.3	0.994272	4.91158e-05
Jmzn006005	Solyc08g029000.3	0.938326	0.00558816
Jmzn006005	Solyc09g014350.3	-0.944286	0.00456956
MWS201447	Solyc05g056170.3	0.851288	0.0315284
MWS201447	Solyc08g082340.3	0.869752	0.0243421
MWS201447	Solyc08g008310.3	0.892721	0.016646
MWS201447	Solyc08g082280.3	0.818667	0.0463413
MWS201447	Solyc07g045290.3	0.926529	0.00789874
MWS201447	Solyc08g067410.2	0.825135	0.0431932
MWS201447	Solyc10g009240.3	0.91481	0.010577
MWS201447	Solyc03g097030.3	0.938178	0.00561476
MWS201447	Solyc03g111170.3	0.848016	0.0328932
MWS201447	Solyc11g067170.2	0.949222	0.00380216
MWS201447	Solyc02g078650.3	0.831227	0.0403227
mws0636	Solyc01g094700.3	0.895605	0.0157786
mws0636	Solyc08g082340.3	0.875692	0.0222182
mws0636	Solyc10g009240.3	0.962067	0.00213105
mws0636	Solyc02g088720.3	0.863503	0.0266757
mws0636	Solyc01g099160.3	0.863727	0.0265903
mws1024	Solyc05g056170.3	0.985162	0.000328617
mws1024	Solyc04g011600.3	0.9683	0.00149138
mws1024	Solyc08g082340.3	0.831876	0.0400227
mws1024	Solyc08g008310.3	0.945182	0.00442509
mws1024	Solyc08g082280.3	0.959635	0.00241114
mws1024	Solyc07g045290.3	0.949609	0.00374486
mws1024	Solyc03g005320.3	0.940967	0.00512448
mws1024	Solyc08g067410.2	0.973179	0.00106941
mws1024	Solyc10g009240.3	0.886035	0.0187421
mws1024	Solyc12g006820.2	0.834148	0.0389795
mws1024	Solyc06g065560.2	0.865536	0.0259052
mws1024	Solyc12g042460.2	0.936214	0.00597316
mws1024	Solyc06g068650.3	0.947078	0.00412695
mws1024	Solyc03g097030.3	0.997305	1.08839e-05
mws1024	Solyc03g111170.3	0.962511	0.0020818
mws1024	Solyc11g067170.2	0.986142	0.000286715
mws1024	Solyc02g014730.3	0.930704	0.00703647
mws1024	Solyc02g078650.3	0.966463	0.00166828
mws1024	Solyc08g029000.3	0.916606	0.0101419
mws1024	Solyc01g099160.3	0.838277	0.0371165
mws1024	Solyc09g014350.3	-0.910309	0.011706
pme1439	Solyc05g056170.3	0.897285	0.0152838
pme1439	Solyc04g011600.3	0.887575	0.0182486
pme1439	Solyc08g008310.3	0.926534	0.00789753
pme1439	Solyc08g082280.3	0.812099	0.0496431
pme1439	Solyc07g045290.3	0.961156	0.00223398
pme1439	Solyc03g005320.3	0.811554	0.049922
pme1439	Solyc08g067410.2	0.851216	0.0315581
pme1439	Solyc12g042460.2	0.903438	0.0135361
pme1439	Solyc03g097030.3	0.887874	0.0181534
pme1439	Solyc03g111170.3	0.824929	0.0432918
pme1439	Solyc11g067170.2	0.912692	0.0111013
pme1439	Solyc01g094750.3	0.820096	0.045637
pme1439	Solyc02g078650.3	0.867431	0.0251968
pme1439	Solyc09g014350.3	-0.88932	0.0176972
MWSmce248	Solyc05g056170.3	0.982959	0.000433123
MWSmce248	Solyc04g011600.3	0.981469	0.000511926
MWSmce248	Solyc08g082340.3	0.84152	0.0356836
MWSmce248	Solyc08g008310.3	0.983859	0.000388708
MWSmce248	Solyc08g082280.3	0.961222	0.00222639
MWSmce248	Solyc07g045290.3	0.966327	0.0016817
MWSmce248	Solyc03g005320.3	0.950671	0.00358999
MWSmce248	Solyc08g067410.2	0.964309	0.00188805
MWSmce248	Solyc12g006820.2	0.906401	0.0127311
MWSmce248	Solyc06g065560.2	0.862773	0.0269549
MWSmce248	Solyc12g042460.2	0.968584	0.00146491
MWSmce248	Solyc06g068650.3	0.953784	0.00315453
MWSmce248	Solyc03g097030.3	0.971304	0.00122336
MWSmce248	Solyc03g111170.3	0.966383	0.00167613
MWSmce248	Solyc11g067170.2	0.952019	0.00339796
MWSmce248	Solyc02g014730.3	0.927713	0.00764918
MWSmce248	Solyc02g078650.3	0.967096	0.00160619
MWSmce248	Solyc08g029000.3	0.899488	0.0146463
MWSmce248	Solyc01g099160.3	0.865651	0.0258622
MWSmce248	Solyc09g014350.3	-0.970054	0.00133171
MWSmce248	Solyc04g080450.1	-0.858046	0.0287963
Lmmn001643	Solyc05g056170.3	0.982959	0.000433123
Lmmn001643	Solyc04g011600.3	0.981469	0.000511926
Lmmn001643	Solyc08g082340.3	0.84152	0.0356836
Lmmn001643	Solyc08g008310.3	0.983859	0.000388708
Lmmn001643	Solyc08g082280.3	0.961222	0.00222639
Lmmn001643	Solyc07g045290.3	0.966327	0.0016817
Lmmn001643	Solyc03g005320.3	0.950671	0.00358999
Lmmn001643	Solyc08g067410.2	0.964309	0.00188805
Lmmn001643	Solyc12g006820.2	0.906401	0.0127311
Lmmn001643	Solyc06g065560.2	0.862773	0.0269549
Lmmn001643	Solyc12g042460.2	0.968584	0.00146491
Lmmn001643	Solyc06g068650.3	0.953784	0.00315453
Lmmn001643	Solyc03g097030.3	0.971304	0.00122336
Lmmn001643	Solyc03g111170.3	0.966383	0.00167613
Lmmn001643	Solyc11g067170.2	0.952019	0.00339796
Lmmn001643	Solyc02g014730.3	0.927713	0.00764918
Lmmn001643	Solyc02g078650.3	0.967096	0.00160619
Lmmn001643	Solyc08g029000.3	0.899488	0.0146463
Lmmn001643	Solyc01g099160.3	0.865651	0.0258622
Lmmn001643	Solyc09g014350.3	-0.970054	0.00133171
Lmmn001643	Solyc04g080450.1	-0.858046	0.0287963
Wafp005168	Solyc05g056170.3	0.866055	0.0257104
Wafp005168	Solyc04g011600.3	0.878759	0.0211579
Wafp005168	Solyc08g082340.3	0.901679	0.0140252
Wafp005168	Solyc08g008310.3	0.937991	0.00564838
Wafp005168	Solyc08g082280.3	0.889825	0.017539
Wafp005168	Solyc07g045290.3	0.866372	0.0255916
Wafp005168	Solyc03g005320.3	0.883086	0.0197044
Wafp005168	Solyc08g067410.2	0.866556	0.0255229
Wafp005168	Solyc12g006820.2	0.957231	0.00270465
Wafp005168	Solyc10g008100.3	0.844042	0.0345878
Wafp005168	Solyc07g007380.3	0.86064	0.0277786
Wafp005168	Solyc12g042460.2	0.883353	0.0196163
Wafp005168	Solyc06g068650.3	0.868942	0.0246387
Wafp005168	Solyc03g097030.3	0.861316	0.0275161
Wafp005168	Solyc03g111170.3	0.884316	0.0193002
Wafp005168	Solyc02g088720.3	0.829138	0.0412967
Wafp005168	Solyc11g067170.2	0.833655	0.0392046
Wafp005168	Solyc02g014730.3	0.873969	0.022825
Wafp005168	Solyc01g094750.3	0.819689	0.0458369
Wafp005168	Solyc02g078650.3	0.831198	0.0403363
Wafp005168	Solyc08g029000.3	0.816882	0.0472282
Wafp005168	Solyc01g099160.3	0.944955	0.00446148
Wafp005168	Solyc09g014350.3	-0.890225	0.0174144
Wafp005168	Solyc04g080450.1	-0.984839	0.000343062
Lmmp002013	Solyc05g056170.3	0.930842	0.00700886
Lmmp002013	Solyc04g011600.3	0.956986	0.00273549
Lmmp002013	Solyc08g008310.3	0.859644	0.0281673
Lmmp002013	Solyc08g082280.3	0.950211	0.00365669
Lmmp002013	Solyc03g005320.3	0.967325	0.001584
Lmmp002013	Solyc08g067410.2	0.937439	0.00574846
Lmmp002013	Solyc12g006820.2	0.950724	0.0035824
Lmmp002013	Solyc06g065560.2	0.864731	0.0262088
Lmmp002013	Solyc12g042460.2	0.955404	0.00293882
Lmmp002013	Solyc06g068650.3	0.962763	0.00205412
Lmmp002013	Solyc03g097030.3	0.853303	0.0307018
Lmmp002013	Solyc03g111170.3	0.931903	0.00679785
Lmmp002013	Solyc06g076800.3	0.925982	0.00801523
Lmmp002013	Solyc02g014730.3	0.947328	0.00408849
Lmmp002013	Solyc02g078650.3	0.93082	0.00701322
Lmmp002013	Solyc08g029000.3	0.899568	0.0146234
Lmmp002013	Solyc01g099160.3	0.812709	0.049332
Lmmp002013	Solyc09g014350.3	-0.974448	0.000971026
MW0014090	Solyc05g056170.3	0.995735	2.72454e-05
MW0014090	Solyc04g011600.3	0.998585	3.00181e-06
MW0014090	Solyc08g008310.3	0.945318	0.00440344
MW0014090	Solyc08g082280.3	0.985564	0.000311076
MW0014090	Solyc07g045290.3	0.91772	0.00987654
MW0014090	Solyc03g005320.3	0.987144	0.000246868
MW0014090	Solyc08g067410.2	0.992244	9.00068e-05
MW0014090	Solyc12g006820.2	0.917601	0.00990474
MW0014090	Solyc06g065560.2	0.87376	0.0228989
MW0014090	Solyc12g042460.2	0.987323	0.000240054
MW0014090	Solyc06g068650.3	0.981674	0.000500664
MW0014090	Solyc03g097030.3	0.966262	0.00168822
MW0014090	Solyc03g111170.3	0.97538	0.000901776
MW0014090	Solyc11g067170.2	0.93924	0.00542548
MW0014090	Solyc06g076800.3	0.813702	0.0488276
MW0014090	Solyc02g014730.3	0.965903	0.00172411
MW0014090	Solyc02g078650.3	0.97712	0.000779277
MW0014090	Solyc08g029000.3	0.925467	0.00812568
MW0014090	Solyc01g099160.3	0.871503	0.0237066
MW0014090	Solyc09g014350.3	-0.973714	0.00102737
MW0014090	Solyc04g080450.1	-0.820793	0.0452951
pmf0395	Solyc05g056170.3	0.994456	4.60127e-05
pmf0395	Solyc04g011600.3	0.997028	1.32325e-05
pmf0395	Solyc08g008310.3	0.950237	0.00365287
pmf0395	Solyc08g082280.3	0.991167	0.000116695
pmf0395	Solyc07g045290.3	0.918888	0.00960179
pmf0395	Solyc03g005320.3	0.986691	0.000264504
pmf0395	Solyc08g067410.2	0.990501	0.00013493
pmf0395	Solyc10g009240.3	0.812498	0.0494396
pmf0395	Solyc12g006820.2	0.929141	0.00735357
pmf0395	Solyc06g065560.2	0.894753	0.0160324
pmf0395	Solyc12g042460.2	0.978357	0.000697578
pmf0395	Solyc06g068650.3	0.987798	0.000222437
pmf0395	Solyc03g097030.3	0.96929	0.0014002
pmf0395	Solyc03g111170.3	0.985337	0.000320915
pmf0395	Solyc11g067170.2	0.936038	0.00600584
pmf0395	Solyc06g076800.3	0.81601	0.047664
pmf0395	Solyc02g014730.3	0.972902	0.00109149
pmf0395	Solyc02g078650.3	0.982083	0.000478627
pmf0395	Solyc08g029000.3	0.941921	0.00496187
pmf0395	Solyc01g099160.3	0.87214	0.0234772
pmf0395	Solyc09g014350.3	-0.973789	0.00102148
pmf0395	Solyc04g080450.1	-0.828585	0.0415563
MW0102909	Solyc05g056170.3	0.993706	5.92936e-05
MW0102909	Solyc04g011600.3	0.997142	1.22373e-05
MW0102909	Solyc08g008310.3	0.946836	0.00416446
MW0102909	Solyc08g082280.3	0.991893	9.83221e-05
MW0102909	Solyc07g045290.3	0.913717	0.010846
MW0102909	Solyc03g005320.3	0.988511	0.000197231
MW0102909	Solyc08g067410.2	0.990891	0.00012408
MW0102909	Solyc12g006820.2	0.931541	0.00686946
MW0102909	Solyc06g065560.2	0.894728	0.01604
MW0102909	Solyc12g042460.2	0.97902	0.000655621
MW0102909	Solyc06g068650.3	0.98896	0.00018215
MW0102909	Solyc03g097030.3	0.966505	0.00166408
MW0102909	Solyc03g111170.3	0.984945	0.000338285
MW0102909	Solyc11g067170.2	0.932161	0.00674703
MW0102909	Solyc06g076800.3	0.823649	0.0439074
MW0102909	Solyc02g014730.3	0.974797	0.000944772
MW0102909	Solyc02g078650.3	0.98135	0.000518498
MW0102909	Solyc08g029000.3	0.942618	0.00484464
MW0102909	Solyc01g099160.3	0.872537	0.0233348
MW0102909	Solyc09g014350.3	-0.974317	0.000980942
MW0102909	Solyc04g080450.1	-0.827643	0.0420001
pmb0889	Solyc05g056170.3	0.997673	8.11885e-06
pmb0889	Solyc04g011600.3	0.993696	5.9485e-05
pmb0889	Solyc08g082340.3	0.824486	0.0435044
pmb0889	Solyc08g008310.3	0.956233	0.00283145
pmb0889	Solyc08g082280.3	0.986643	0.000266432
pmb0889	Solyc07g045290.3	0.936506	0.00591916
pmb0889	Solyc03g005320.3	0.977735	0.000738091
pmb0889	Solyc08g067410.2	0.991175	0.000116464
pmb0889	Solyc10g009240.3	0.844519	0.0343823
pmb0889	Solyc12g006820.2	0.904006	0.0133801
pmb0889	Solyc06g065560.2	0.887462	0.0182845
pmb0889	Solyc12g042460.2	0.971365	0.0012182
pmb0889	Solyc06g068650.3	0.979532	0.000624133
pmb0889	Solyc03g097030.3	0.98542	0.000317295
pmb0889	Solyc03g111170.3	0.983263	0.00041786
pmb0889	Solyc11g067170.2	0.96032	0.00233052
pmb0889	Solyc02g014730.3	0.964523	0.00186563
pmb0889	Solyc02g078650.3	0.981757	0.000496194
pmb0889	Solyc08g029000.3	0.937565	0.00572556
pmb0889	Solyc01g099160.3	0.870257	0.0241579
pmb0889	Solyc09g014350.3	-0.958429	0.00255625
pmb0889	Solyc04g080450.1	-0.817681	0.0468302
Waln013216	Solyc05g056170.3	0.883538	0.0195552
Waln013216	Solyc04g011600.3	0.890905	0.0172033
Waln013216	Solyc08g008310.3	0.856737	0.0293163
Waln013216	Solyc08g082280.3	0.951019	0.00353992
Waln013216	Solyc03g005320.3	0.915868	0.0103196
Waln013216	Solyc08g067410.2	0.89552	0.0158038
Waln013216	Solyc12g006820.2	0.952633	0.00331227
Waln013216	Solyc06g065560.2	0.948963	0.0038407
Waln013216	Solyc12g042460.2	0.826714	0.0424402
Waln013216	Solyc06g068650.3	0.95122	0.00351114
Waln013216	Solyc03g097030.3	0.877365	0.0216369
Waln013216	Solyc03g111170.3	0.959688	0.00240486
Waln013216	Solyc06g076800.3	0.842071	0.0354428
Waln013216	Solyc02g014730.3	0.961386	0.00220779
Waln013216	Solyc02g078650.3	0.908829	0.0120894
Waln013216	Solyc08g029000.3	0.981843	0.000491526
Waln013216	Solyc01g099160.3	0.827561	0.0420391
Waln013216	Solyc09g014350.3	-0.873001	0.0231691
Wagn011658	Solyc05g056170.3	0.989296	0.000171252
Wagn011658	Solyc04g011600.3	0.990859	0.000124968
Wagn011658	Solyc08g008310.3	0.970045	0.00133255
Wagn011658	Solyc08g082280.3	0.968715	0.00145281
Wagn011658	Solyc07g045290.3	0.950621	0.00359718
Wagn011658	Solyc03g005320.3	0.962799	0.0020501
Wagn011658	Solyc08g067410.2	0.972672	0.00110999
Wagn011658	Solyc12g006820.2	0.909104	0.0120177
Wagn011658	Solyc06g065560.2	0.875511	0.0222818
Wagn011658	Solyc12g042460.2	0.978531	0.000686398
Wagn011658	Solyc06g068650.3	0.966025	0.00171185
Wagn011658	Solyc03g097030.3	0.96556	0.0017587
Wagn011658	Solyc03g111170.3	0.970851	0.00126215
Wagn011658	Solyc11g067170.2	0.941158	0.00509172
Wagn011658	Solyc02g014730.3	0.938114	0.00562632
Wagn011658	Solyc02g078650.3	0.977628	0.000745181
Wagn011658	Solyc08g029000.3	0.909005	0.0120433
Wagn011658	Solyc01g099160.3	0.849812	0.0321409
Wagn011658	Solyc09g014350.3	-0.981658	0.000501573
Wagn011658	Solyc04g080450.1	-0.833954	0.039068
Wagn012030	Solyc05g056170.3	0.995483	3.0555e-05
Wagn012030	Solyc04g011600.3	0.996434	1.90555e-05
Wagn012030	Solyc08g008310.3	0.937035	0.005822
Wagn012030	Solyc08g082280.3	0.995032	3.69528e-05
Wagn012030	Solyc07g045290.3	0.907017	0.0125669
Wagn012030	Solyc03g005320.3	0.989301	0.000171092
Wagn012030	Solyc08g067410.2	0.994242	4.96338e-05
Wagn012030	Solyc10g009240.3	0.822972	0.0442343
Wagn012030	Solyc12g006820.2	0.920556	0.00921643
Wagn012030	Solyc06g065560.2	0.904997	0.0131097
Wagn012030	Solyc12g042460.2	0.972269	0.00114284
Wagn012030	Solyc06g068650.3	0.992479	8.46272e-05
Wagn012030	Solyc03g097030.3	0.971357	0.00121891
Wagn012030	Solyc03g111170.3	0.988282	0.000205175
Wagn012030	Solyc11g067170.2	0.935546	0.00609758
Wagn012030	Solyc06g076800.3	0.821904	0.0447526
Wagn012030	Solyc02g014730.3	0.979893	0.000602345
Wagn012030	Solyc02g078650.3	0.985607	0.000309241
Wagn012030	Solyc08g029000.3	0.953379	0.00320957
Wagn012030	Solyc01g099160.3	0.862502	0.0270589
Wagn012030	Solyc09g014350.3	-0.965242	0.00179117
MWS5231	Solyc05g056170.3	0.993478	6.36665e-05
MWS5231	Solyc04g011600.3	0.99883	2.05379e-06
MWS5231	Solyc08g008310.3	0.930183	0.00714141
MWS5231	Solyc08g082280.3	0.990249	0.000142156
MWS5231	Solyc07g045290.3	0.897614	0.0151876
MWS5231	Solyc03g005320.3	0.991581	0.00010603
MWS5231	Solyc08g067410.2	0.992094	9.35013e-05
MWS5231	Solyc12g006820.2	0.923617	0.00852877
MWS5231	Solyc06g065560.2	0.893811	0.0163156
MWS5231	Solyc12g042460.2	0.982783	0.000442107
MWS5231	Solyc06g068650.3	0.990602	0.000132081
MWS5231	Solyc03g097030.3	0.957034	0.00272951
MWS5231	Solyc03g111170.3	0.980188	0.00058489
MWS5231	Solyc11g067170.2	0.921078	0.00909727
MWS5231	Solyc06g076800.3	0.839735	0.0364693
MWS5231	Solyc02g014730.3	0.974805	0.000944152
MWS5231	Solyc02g078650.3	0.982677	0.000447537
MWS5231	Solyc08g029000.3	0.940169	0.00526262
MWS5231	Solyc01g099160.3	0.854947	0.0300347
MWS5231	Solyc09g014350.3	-0.976647	0.000811687
MWSslk132	Solyc05g056170.3	0.978634	0.000679909
MWSslk132	Solyc04g011600.3	0.987819	0.000221646
MWSslk132	Solyc08g082340.3	0.820803	0.0452901
MWSslk132	Solyc08g008310.3	0.943552	0.00468964
MWSslk132	Solyc08g082280.3	0.98062	0.000559765
MWSslk132	Solyc07g045290.3	0.898448	0.0149455
MWSslk132	Solyc03g005320.3	0.986719	0.000263422
MWSslk132	Solyc08g067410.2	0.980855	0.000546266
MWSslk132	Solyc12g006820.2	0.949654	0.00373827
MWSslk132	Solyc06g065560.2	0.853196	0.0307454
MWSslk132	Solyc12g042460.2	0.984726	0.000348151
MWSslk132	Solyc06g068650.3	0.97453	0.000964831
MWSslk132	Solyc03g097030.3	0.944211	0.00458186
MWSslk132	Solyc03g111170.3	0.965473	0.00176763
MWSslk132	Solyc02g088720.3	0.817827	0.0467578
MWSslk132	Solyc11g067170.2	0.91353	0.0108923
MWSslk132	Solyc06g076800.3	0.843561	0.0347955
MWSslk132	Solyc02g014730.3	0.966022	0.00171212
MWSslk132	Solyc02g078650.3	0.954388	0.00307323
MWSslk132	Solyc08g029000.3	0.913198	0.0109749
MWSslk132	Solyc01g099160.3	0.904336	0.0132895
MWSslk132	Solyc09g014350.3	-0.973098	0.00107585
MWSslk132	Solyc04g080450.1	-0.867287	0.0252504
MWSslk133	Solyc05g056170.3	0.955402	0.00293907
MWSslk133	Solyc04g011600.3	0.961505	0.00219427
MWSslk133	Solyc08g082340.3	0.862477	0.0270685
MWSslk133	Solyc08g008310.3	0.942521	0.00486072
MWSslk133	Solyc08g082280.3	0.983668	0.00039791
MWSslk133	Solyc07g045290.3	0.882064	0.0200432
MWSslk133	Solyc03g005320.3	0.973626	0.00103424
MWSslk133	Solyc08g067410.2	0.964309	0.00188807
MWSslk133	Solyc10g009240.3	0.835426	0.0383984
MWSslk133	Solyc12g006820.2	0.973954	0.00100879
MWSslk133	Solyc06g065560.2	0.876274	0.0220151
MWSslk133	Solyc12g042460.2	0.939798	0.00532727
MWSslk133	Solyc06g068650.3	0.971619	0.00119679
MWSslk133	Solyc03g097030.3	0.943912	0.00463055
MWSslk133	Solyc03g111170.3	0.974448	0.000971036
MWSslk133	Solyc11g067170.2	0.901296	0.0141329
MWSslk133	Solyc06g076800.3	0.83867	0.0369416
MWSslk133	Solyc02g014730.3	0.97808	0.000715465
MWSslk133	Solyc02g078650.3	0.93671	0.00588174
MWSslk133	Solyc08g029000.3	0.942297	0.00489842
MWSslk133	Solyc01g099160.3	0.934545	0.00628634
MWSslk133	Solyc09g014350.3	-0.938019	0.0056434
MWSslk133	Solyc04g080450.1	-0.903639	0.0134808
